1  
2  
3  
4  
5  
6  
7  
8  
9  
10  
11  
12  
13  
14  
15  
16  
17  
18  
19  
20  
21  
22  
23  
24  
25  
26  
27  
28  
29  
30  
31  
32

## Cell type specific transcriptional reprogramming of maize leaves during *Ustilago maydis* induced tumor formation

Mitzi Villajuana-Bonequi<sup>1</sup>, Alexandra Matei<sup>1</sup>, Corinna Ernst<sup>2</sup>, Asis Hallab<sup>3</sup>, Björn Usadel<sup>3</sup> and Gunther Doehle<sup>1,\*</sup>

<sup>1</sup>Botanical Institute and Cluster of Excellence on Plant Sciences (CEPLAS), BioCenter, University of Cologne, Zùlpicher Str. 47a, Cologne 50674, Germany.

<sup>2</sup>Center for Familial Breast and Ovarian Cancer, Medical Faculty, University Hospital Cologne, University of Cologne, Cologne 50931, Germany.

<sup>3</sup>BioSC, IBG-2, Institute of Botany, RWTH Aachen, Worringer Weg 3, Aachen 52074, Germany

\*To whom correspondence should be addressed:

[g.doehle@uni-koeln.de](mailto:g.doehle@uni-koeln.de)

Tel: +49 221-470-1647

Fax: +49 221-470-7406

### Key words

*Zea mays*, *Ustilago maydis*, pre-replication complex (pre-RC), SGT1 (suppressor of G2 allele of *skp1*), endoreduplication, hypertrophy, hyperplasia, tumor

Word count: 10,368

Figures: 8

33 **Summary**

34

35 *Ustilago maydis* is a biotrophic pathogen and well-established genetic model to  
36 understand the molecular basis of biotrophic interactions. *U. maydis* suppresses plant  
37 defense and induces tumors on all aerial parts of its host plant maize. In a previous  
38 study we found that *U. maydis* induced leaf tumor formation builds on two major  
39 processes: the induction of hypertrophy in the mesophyll and the induction of cell  
40 division (hyperplasia) in the bundle sheath. In this study we analyzed the cell-type  
41 specific transcriptome of maize leaves 4 days post infection. This analysis allowed  
42 identification of key features underlying the hypertrophic and hyperplastic cell identities  
43 derived from mesophyll and bundle sheath cells, respectively. We examined the  
44 differentially expressed (DE) genes with particular focus on maize cell cycle genes and  
45 found that three A-type cyclins, one B-, D- and T-type are upregulated in the  
46 hyperplastic tumorous cells, in which the *U. maydis* effector protein See1 promotes cell  
47 division. Additionally, most of the proteins involved in the formation of the pre-  
48 replication complex (pre-RC, that assure that each daughter cell receives identical DNA  
49 copies), the transcription factors E2F and DP as well as several D-type cyclins are  
50 deregulated in the hypertrophic cells.

51

52 **Introduction**

53

54 *Ustilago maydis* is a biotrophic fungus that triggers tumors in all aerial parts of its host  
55 plant maize (*Zea mays*). To attenuate activity of the maize immune system and colonize  
56 the different maize organs, *U. maydis* deploys a set of proteins, so called effectors,  
57 which manipulate the plant cell metabolism, structure and function for its growth  
58 benefit. Such effectors are deployed in a time-, organ- and cell-type-specific manner to  
59 reprogram and/or cope with the different maize cell environments<sup>1-11</sup>.

60

61 *U. maydis* infection induces characteristic symptoms that include chlorosis, which  
62 appears 24 hours post infection (hpi), such lesions are produced in the absence of fungal  
63 hyphae suggesting that they result from fungal products such as toxins or effectors<sup>12</sup>. 2  
64 days post infection (dpi) anthocyanin streaking appears and fungal hyphae proliferate  
65 and penetrate in between mesophyll cells. At 4 dpi the hyphae have reached the bundle  
66 sheath cells and induce tumor formation while at 5 dpi small tumors are visible. 8 dpi  
67 maize leaf cells are enlarged and fungal hyphae have undergone branching, a process  
68 described as the beginning of teliospore formation<sup>13,14</sup>. Finally, at 12-14 dpi large  
69 tumors are formed; inside such tumorous tissue hypha differentiate to give place to the  
70 diploid teliospores<sup>15</sup>. Several studies have investigated maize transcriptional  
71 reprogramming in response to *U. maydis* infection<sup>10,15-20</sup>. On the cellular level, *U.*  
72 *maydis* induced tumors in maize leaves were found to be constituted of hypertrophic  
73 tumor (HTT) cells coming from transformed mesophyll cells (M), and hyperplastic  
74 tumor (HPT) cells derived from bundle sheath cells (BS)<sup>4</sup>.

75

76 Once induced, maize leaf tumorous cells proliferate even in the absence of the fungus,  
77 indicating that *U. maydis* somehow establishes a self-inducing proliferative program in  
78 the maize tissues<sup>21</sup> (Wenzler and Meins, 1986). Remarkably, the cells surrounding the  
79 tumors were not able to proliferate, showing that such dedifferentiation and the  
80 maintenance of this status is cell-zone specific<sup>21</sup>. Later studies showed that *U. maydis*  
81 can extend the undifferentiated state of infected maize tissue<sup>16</sup>. In the leaf this is likely  
82 by preventing the establishment of the leaf as a source instead of sink<sup>15,22</sup>. Studies on

83 the maize vascular anatomy and plastid development of intermediate veins show that at  
84 the source/sink transition there is minimal development of bundle sheath plastids at the  
85 leaf base, as well as in both sections adjoining the source-sink boundary<sup>23</sup>. Therefore  
86 successful tumor formation is likely to happen just before the source/sink transition is  
87 established suggesting that the “proper” photosynthetic establishment may be crucial to  
88 prevent *U. maydis* capacity to induce tumors.

89  
90 Tumors have been defined as a mass of cells that present abnormal cell divisions and  
91 decreased cell differentiation; as a consequence tumors grow in an unorganized way and  
92 vary in size and shape<sup>24</sup>. The cell cycle is tightly regulated and its mechanisms and core  
93 machinery are largely conserved among eukaryotes<sup>25-27</sup>. Two key regulatory molecules  
94 determine cell cycle progression; cyclins and cyclin-dependent kinases (CDKs)<sup>26</sup>.  
95 CDKs are known as master cell cycle regulators and must associate with their  
96 regulatory cyclin partner to be active<sup>26</sup>. Besides, CDK activity is regulated in other ways  
97 including changes in the phosphorylated status, interaction with inhibitory proteins or  
98 non-catalytic CDK-specific inhibitors (CKIs), and proteolysis by the 26S  
99 proteasome<sup>28,29</sup>. Two major classes of CDKs can be distinguished, CDKA and CDKB<sup>26</sup>.  
100 CDKA regulate the G1-to-S and G2-to-M-transitions while CDKB control the G2-to-M  
101 transition<sup>26</sup>. Plants encode for cyclins grouped as A-, B-, and D- types<sup>26</sup>. A-type cyclins  
102 control mainly S-phase and the G2/M transitions; B-type cyclins control G2/M  
103 transition, while D-type cyclins are involved in G1/S transition<sup>28,30</sup>. Two major  
104 multimeric E3 ubiquitin ligases target cell cycle regulators to the proteasome to promote  
105 cell cycle progression: the anaphase promoting complex/cyclosome (APC/C) and  
106 Skp1/Cullin/F-box complex<sup>29,31</sup>. APC/C is multiprotein complex and controls the exit  
107 from mitosis by targeting important mitotic promoting proteins like cyclin B for  
108 degradation via the 26S proteasome<sup>29</sup>. SCF regulates mainly the G1-to-S transition by  
109 degrading CDK inhibitors (CKIs) like ICK/KRP proteins<sup>31,32</sup>. The cell cycle is  
110 relatively well functionally characterized in the plant model *Arabidopsis thaliana*; in  
111 contrast, less is known about the roles of key cell cycle-controlling genes in maize<sup>33,34</sup>.

112  
113 This study is combining the high-resolution technique Laser Capture Microdissection  
114 with high transcriptome profiling RNAseq to characterize maize tumorous mesophyll  
115 and bundle sheath cells induced by *U. maydis* infection. In a previous article we have  
116 described the *U. maydis* transcriptome showing the specificity of effector deployment in  
117 a cell type-specific manner<sup>4</sup>. We now describe the maize-specific transcriptome  
118 response of micro-dissected mesophyll and bundle sheath tumorous cells. Moreover, we  
119 take the information of an *U. maydis* effector deletion mutant, SG200 $\Delta$ see1<sup>8</sup>, which  
120 induces hypertrophic but not hyperplastic tumors in maize leaves after infection<sup>4</sup> to  
121 pinpoint possible cell-cycle related genes and/or the mechanism that could explain the  
122 observed phenotype. Since tumors are a product of cell cycle alterations, we analyze  
123 this cellular process in a deeper detail.

## 124 125 **Materials and Methods**

126  
127 Plant growth conditions, fungal infections, tissue embedding, sectioning, single-cell  
128 LCM and RNA sequencing details are fully described in Matei et al., 2018.

## 129 130 **RNAseq analysis**

131

132 The quant utility of kallisto v0.43.1<sup>35</sup> was used for alignment-free estimation of  
133 RNAseq read abundancies in a merged reference genome consisting of *Zea mays* B73  
134 RefGen\_v3<sup>36</sup> and *Ustilago maydis* 521 v2.0 available at NCBI Genomes Server  
135 (<ftp://ftp.ncbi.nih.gov/genomes/>), using the supplied annotations. Resulting estimated  
136 counts served as input for differential expression tests with sleuth v0.29.0<sup>37</sup> following  
137 the protocol described at  
138 [https://pachterlab.github.io/sleuth\\_walkthroughs/trapnell/analysis.html](https://pachterlab.github.io/sleuth_walkthroughs/trapnell/analysis.html).  
139 Differential expressed (DE) genes were selected due to criterion p-value <0.05 after  
140 correction of p-values for multiplicity using the Benjamini-Hochberg approach with  
141 FDR set to 0.05<sup>38</sup>.

142  
143 Expression changes were assessed as Log2Fold-change calculated as cell-type specific  
144 infected (treated) divided by the cell-type specific uninfected (untreated) values. The  
145 experimental design allowed six comparisons: mock bundle sheath cells against mock  
146 mesophyll cells (MBS.vs.MMS), mock bundle sheath cells against SG200 infected  
147 bundle sheath cells (MBS.vs.HPT), mock mesophyll cells against SG200 infected  
148 mesophyll cells (MMS.vs.HTT), SG200 $\Delta$ see1 infected mesophyll cells against mock  
149 mesophyll cells (MMS.vs.seeTC), SG200 $\Delta$ see1 infected mesophyll cells against SG200  
150 infected mesophyll cells (SeeTC.vs.HTT) and SG200 infected bundle sheath cells  
151 against SG200 infected mesophyll cells (HPT.vs.HTT).

152

### 153 **Core Cell Cycle Gene List**

154

155 This table was generated based on the MapMan Bin annotations using Mercator4 V1  
156 and annotating data reported in the literature. A full table including all cell cycle related  
157 processes like: organelle machinery for DNA replication and organelle fission,  
158 cytokinesis, chromatin condensation, sister chromatid separation, chromosome  
159 segregation and DNA damage response is provided in the supplementary material  
160 (Supplementary Table 3).

161

### 162 **Core DNA Replication Machinery Gene List**

163

164 This list is based on the published table by Shultz et al., 2007. We look for the reported  
165 orthologues and functional annotations provided at Joint Genome Institute (JGI),  
166 *Zmays*, 5b+, annotation, file: *Zmays*: *Zmays\_284\_5b+*.annotation\_info.txt. Based on  
167 that annotation we seek for Arabidopsis homologues and introduced the reported maize  
168 gene. To keep the coherence with the table reported by Shultz et al., 2007, Rice locus  
169 homologues were searched for syntenic orthologues provided at Freeling lab  
170 ([ftp.maizgedb.org/FTP/bulk/grass\\_syntenic\\_orthologs.csv](ftp.maizgedb.org/FTP/bulk/grass_syntenic_orthologs.csv)), which are mapped to  
171 RefGen\_v2. In general, by this method we detect different maize putative homologues  
172 per Arabidopsis gene. To facilitate table read the reported orthologues are bold letters  
173 prioritizing the orthologues between maize and rice (Supplementary Table 4).

174

### 175 **Skp1/Cullin1/F-box complex (SCF) Genes Table**

176

177 This table was generated based on the MapMan Bin annotations using Mercator4 V1. In  
178 addition LRR-maize genes were annotated based on the data provided by Song et al.,  
179 2015.

180

181 **Small ubiquitin-like modifier (SUMO) and the SUMOylation Machinery Genes**  
182 **Table**

183

184 This table was generated based on the information provided by Augustine et al., 2016,  
185 in this paper a full analysis and description of the SUMO system in maize has being  
186 thoroughly performed by these topic experts. Lectors interested on the topic please refer  
187 to that publication (Supplementary Table 5).

188

189 **Gene Ontology (GO) and metabolic pathway analyses**

190

191 Differentially expressed (DE) genes were analyzed for gene ontology (GO) enrichment  
192 with the web-based agriGO software<sup>39</sup>. To identify possible connections among DE  
193 genes list we applied the Batch SEA function SEACOMPARE, which allows  
194 comparisons among the significant GO terms from the results of selected datasets to  
195 effectively identify GO terms.

196

197 **RESULTS**

198

199 **Analysis of the maize transcriptional response during tumor formation in**  
200 **hyperplastic and hypertrophic cells**

201

202 In a previous work we showed that *U. maydis*-induced maize tumors are constituted of  
203 hypertrophic mesophyll tumor (HTT) cells coming from the mesophyll cells and small  
204 hyperplastic tumor (HPT) cells coming from the bundle sheath cells<sup>4</sup>. In contrast to the  
205 solopathogenic strain SG200<sup>3</sup>, the *U. maydis* effector deletion mutant SG200 $\Delta$ see1 fails  
206 to induce DNA synthesis and cell division in bundle sheath cells<sup>4</sup>. Consequently, tumors  
207 caused by SG200 $\Delta$ see1 are mainly built of HTT; while the bundle-sheath derived small  
208 tumor cells are missing<sup>4</sup>. To determine genes differentially expressed (DE) in each  
209 particular tumorous cell type we performed six pairwise comparisons of cell-type  
210 specific control mock groups against SG200 or SG200 $\Delta$ see1 infected cells (Table I;  
211 Supplementary Dataset 1). The highest number of DE genes was observed in the SG200  
212 infected cells (Table I), either HTT or HPT when compared to uninfected/mock cells  
213 (Mock Bundle Sheath, MBS; Mock Mesophyll cells, MMS), indicating that *U. maydis*  
214 infection induces a strong transcriptional maize cell reprogramming, which is in  
215 agreement with previous reports<sup>15,20</sup>. SG200 $\Delta$ see1 infection induces a milder effect in  
216 the mesophyll cells; we found less DE genes when we compared SG200 $\Delta$ see1 to the  
217 MMS than to the HTT (Table I). This is in agreement with the mild SG200 $\Delta$ see1 tumor  
218 phenotype observed, where the bundle sheath structure is largely preserved and the  
219 hypertrophic cells are mostly absent<sup>4</sup>. Few DE genes were detected when we compared  
220 HTT against HPT, suggesting that many of the DE genes are shared between these two  
221 datasets and their expression behaviors are likely similar (Table I).

222

223 More genes are up-regulated than down-regulated in response to SG200 infection in  
224 both cell types (Figure 1A). The largest difference is observed in the HTT dataset where  
225 6,852 are upregulated in contrast to 1,504 downregulated genes (Figure 1A). To  
226 determine a significant change in gene expression we applied an arbitrary absolute log2-  
227 Fold Change (log2FC) threshold of 1.5. This cutoff drastically reduced the number of  
228 DE genes; however it kept the observed tendency of more genes being upregulated than  
229 downregulated (Figure 1A).

230

231 A small number of genes is DE in all considered datasets (67 genes); in contrast, many  
232 genes are shared between HTT and HPT datasets (2680 genes, Figure 1B). HPT  
233 contains the highest number of uniquely expressed genes (4553), followed by HTT  
234 (3946), and seeTC (101, Figure 1B).

235

236 In summary, the results demonstrate that SG200 infection has a strong effect on gene  
237 expression in both mesophyll and bundle sheath cells. This is in line with the  
238 observation that tumor formation correlates with a strong cell reprogramming<sup>15</sup> and this  
239 may involve the gene expression of otherwise silenced genes. Moreover, the See1  
240 effector seems to have a key role in such response since the number of DE genes is  
241 drastically reduced in SG200 $\Delta$ see1 infected mesophyll cells (seeTC) in comparison to  
242 SG200 infected cells (HTT, Figure 1B). This gene expression profile reflects the  
243 phenotype, as SG200 $\Delta$ see1 infections induce small tumors<sup>4,8</sup>.

244

#### 245 **Functional categorization of DE genes in the hyperplasic and hypertrophic cells:** 246 **Gene Ontology enrichment (GO) analysis**

247

248 To explore the nature of the data we analyzed all DE genes for Gene Ontology  
249 enrichment (GO) with the web-based agriGO software<sup>39</sup>. The Singular Enrichment  
250 Analysis (SEA) revealed a strong and shared enrichment for several GO-terms between  
251 HPT and HTT datasets (Supplementary Dataset 2 and Supplementary Table 1). A total  
252 of 171 different GO terms were assigned to all five datasets. 101 terms are common  
253 between HPT and HTT datasets. In contrast, only 23 GO terms are common between  
254 HTT and seeTC datasets, which is interesting as the only difference is the deletion of  
255 the See1 effector supporting the strong effect of this protein. We further analyzed the  
256 data with Parametric Analysis of Gene set Enrichment (PAGE), which takes the  
257 expression levels into account. This analysis showed 163, 77 and 15 GO terms for HPT,  
258 HTT and seeTC respectively (Supplementary Dataset 2). The majority of the GO terms  
259 found in HTT and seeTC datasets are shared with HPT with exception of 13 unique to  
260 HTT and 4 unique to seeTC datasets. These include very diverse functions in HTT and  
261 kinase and transferase activities for seeTC (Supplementary Dataset 2 and  
262 Supplementary Table 2).

263

264 Since a considerable number of genes were DE genes and unique in each dataset (Table  
265 I and Figure 1B), we decided to explore if such gene subsets were also enriched for  
266 specific GO terms. After SEA analysis we found 55 HPT and 44 HTT GO enriched  
267 terms, out of which 31 are shared (Supplementary Dataset 3). This suggests that similar  
268 functions are performed by different genes that are expressed specifically in each cell-  
269 type. Also interesting is that fewer GO terms are lost in the HTT dataset, when  
270 comparing the terms assigned to the full list of DE genes against unique DE genes (77  
271 full vs. 44 unique), than in the HPT dataset (163 full vs. 55 unique), suggesting that a  
272 lot of the functional diversity for HTT is contain/shared within the unique DE genes.  
273 Further analysis with PAGE showed 40 GO terms enriched for HPT and only 5 for HTT  
274 (Supplementary Dataset 3). These last five terms are shared with HPT dataset and  
275 include: GO:0010467-gene expression; GO:0034645-cellular macromolecule  
276 biosynthetic process; GO:0009059-macromolecule biosynthetic process; GO:0043229-  
277 intracellular organelle and GO:0043226-organelle. The remaining datasets showed no  
278 enrichment (Table I).

279

280 **Dissecting of differentially regulated biological processes: MapMan-Bin**  
281 **enrichment analysis**

282

283 For a more detailed and less redundant functional classification of DE genes a  
284 MapMan-Bin enrichment analysis was performed. MapMan is a software tool  
285 composed of different modules including a set of Scavengers which assign non-  
286 redundant functional categories to a set of given genes, proteins or metabolites and an  
287 Image Annotator module which allows the visualization of data on diagrams of  
288 biological processes or pathways relying on mapping files created by the  
289 scavengers<sup>40,41</sup>. The plant gene function ontology MapMan consist of 34 major bins and  
290 is organized as a tree, thus enabling the categorization of gene functions at different  
291 levels of generality<sup>41</sup>. Here, we used direct (level one) children of the root node to  
292 generate the profiles, counting all annotations by their respective level one. Afterwards  
293 we tested for overrepresented terms in the intersection (both terms), difference (one but  
294 not the other) and union (either) in mesophyll and bundle sheath datasets infected with  
295 SG200 using exact Fischer tests<sup>42</sup>. This analysis showed an overrepresentation of five  
296 MapMan-Bins (Figure 2A). Terms include chromatin assembly and remodeling  
297 (histones, H4-type histone - 12.1.5), cell-cycle (regulation cyclins, CYCA-type cyclin –  
298 13.1.1.1), protein biosynthesis (translation and elongation, eEF1A aminoacyl-tRNA  
299 binding factor – 17.4.1), cytoskeleton (microtubular network, kinesin microtubule-based  
300 motor protein activities, kinesin-5 motor protein – 20.1.3.4) and protein modification  
301 (phosphorylation, TKL kinase superfamily - 18.9.1). Interestingly, when looking for the  
302 expression status of genes annotated with any of these five MapMan-Bins we find genes  
303 that are both DE and tissue specific (Figure 2B). This indicates that while the respective  
304 gene functions (MapMan-Bins) are shared and characteristic for both tumor tissues,  
305 there are tissue specific DE genes implementing these functions. Based on these results,  
306 and the clear implication of the deregulation of cell cycle regulating genes in tumor  
307 formation, we further examined the DE genes with particular focus on maize cell cycle  
308 genes.

309

310 For a general overview of the effect of *U. maydis* infection in maize mesophyll and  
311 bundle sheath cells we generate a metabolic overview map with MapMan<sup>40,41</sup>. The  
312 strongest effect is observed in the photosynthetic light reactions section for the HPT  
313 dataset, where many genes are downregulated (Figure 3 and Supplemental Figure 1).  
314 Comparably, genes involved in starch formation were downregulated in the HPT dataset  
315 (Figure 3 and Supplemental Figure 2). This is in agreement with our previous finding  
316 that these cells are depleted from chloroplasts<sup>4</sup>. In contrast, starch formation and  
317 degradation related genes were slightly but mostly upregulated in the HTT dataset  
318 (Figure 3 and Supplemental Figure 2). This provides a picture of the maize leaf  
319 response towards *U. maydis* infection and supports the hypothesis of HPT working as a  
320 strong active sink tissue that stimulates the attraction of nutrient flow from source  
321 tissues, which in this case might be partially enabled by HTT<sup>4,43</sup>. For the seeTC dataset  
322 we observe mostly strong upregulation in very punctual but overall distributed  
323 processes (Figure 3).

324

325 In maize, cellulose microfibrils are mainly crosslinked with glucuronoarabinoxylans  
326 (GAXs)<sup>44</sup>. During cell elongation in growing tissues the mixed-linkage (1→3), (1→4)-  
327  $\beta$ -d-glucan appears transiently as the major cross-linking glycan<sup>45</sup>. Analysis of gene  
328 expression of cell wall precursors in HPT and HTT datasets show an upregulation for  
329 genes involved in the transformation from UDP-D-glucose to: sucrose, UDP-L-

330 rhamnose, UDP-D-galacturonic acid and UDP-D-xylose (Supplemental Figure 3).  
331 Interestingly, the conversion of UDP-D-xylose to UDP-L-arabinose is upregulated in  
332 the HPT dataset (Supplemental Figure 3). This is in agreement with our data which  
333 indicate that *U. maydis* infection change the ratio contents of monosaccharides,  
334 increasing arabinose content and reducing xylose<sup>4</sup>.

335

336 We have previously shown that tumors develop and expand in between two primary leaf  
337 veins where lignin deposition increases defining the tumor borders<sup>4</sup>. Lignification is  
338 commonly associated with plant defense response. The HTT dataset shows an  
339 upregulation of genes involved in the formation of three important lignin precursors,  
340 namely p-coumaryl alcohol, coniferyl alcohol and sinapyl alcohol<sup>46,47</sup> (Supplemental  
341 Figure 4).

342

### 343 **Tissue-specific regulation of cell-cycle associated genes by *U. maydis***

344

345 The See1 effector is required for the activation of maize cell mitotic division in bundle  
346 sheath cells<sup>4,8</sup>. Therefore, we asked if the unique subset of maize cell cycle genes DE in  
347 the bundle sheath SG200 infected cells could reflect the processes that are likely See1-  
348 driven.

349

350 Cell cycle comprises a sequence of events including DNA replication, cell division and  
351 growth all of them requiring the precise coordination of several protein complexes<sup>48</sup>. A  
352 candidate list of core-cell-cycle genes was generated using the MapMan Bin annotations  
353 using Mercator4 V1 and edited based on literature search to include/annotate described  
354 maize cell-cycle machinery and core regulator genes<sup>25,29,30,49-61</sup> (Supplementary Table  
355 3). To facilitate the analysis the core DNA replication machinery (pre-replication  
356 complex and genes involved in s-phase) is analyzed in the next chapter.

357 In general, genes that constitute the basic cell cycle machinery appear DE in four out of  
358 five datasets after setting a threshold of  $|\log_2FC| \geq 1.5$  (Table II). The HTT dataset  
359 present the highest number of DE genes (22), followed by HPT (12), HTT.vs.seeTC (5)  
360 and seeTC (1; Table II). The maize genome encodes over 50 cyclins, the majority of  
361 which remain uncharacterized<sup>62,63</sup>. Three cell cycle related cyclins, namely A-, B- and  
362 D-types are DE in the HPT and HTT datasets. A-type cyclins, which normally are  
363 involved in S-phase progression, are upregulated in both HPT and HTT datasets.  
364 *GRMZM2G017081*, which encodes for an A2-type cyclin, is upregulated in the HPT  
365 dataset, and was found as part of a subnetwork that positively correlates with leaf size  
366 and timing traits in maize<sup>64</sup>. Two uncharacterized B-type cyclins appear upregulated in  
367 the HPT and HTT datasets. B-type cyclins are key actors in the G2/M transition and  
368 expressed in a narrow time window from late to mid M phase<sup>62</sup>. Finally, several D-type  
369 cyclins are upregulated in the HTT dataset. D-type cyclins are regarded as G1-specific  
370 and proposed to be sensors of growth conditions by integrating internal and  
371 environmental cues<sup>48,65</sup>. Particularly, *ZmCYCD2;1* has a positive role in the  
372 endoreduplication cycle in endosperm<sup>33</sup>.

373

374 Maize contains at least four Retinoblastoma-related (*RBR*) genes that can be  
375 functionally grouped as repressors *RBR1/2* and promoters *RBR3/4* of the E2F-DP  
376 factors, which promote the transcription of genes required for cell cycle  
377 progression<sup>34,66-68</sup>. We observe an up-regulation of *RBR3/4* genes in the HPT and HTT  
378 cells. Additionally *E2F/DP* coding genes are upregulated in HTT cells (Table II).

379



380 APC13 is upregulated in the HTT dataset. In humans and yeast APC13 is required for  
381 efficient cyclin degradation by promoting the association of the APC3 and APC6  
382 subunits, until now APC13 has not been characterized in plants<sup>29</sup>. CDC20 is strongly  
383 upregulated in seeTC dataset. CDC20 is a crucial co-activator of APC/C to degrade  
384 Securin and CYCB, promoting in this way the onset of anaphase and mitotic exit<sup>29</sup>.

385

386 *OMISSION OF SECON DIVISION 1 (OSD1)/ GIGAS CELL 1(GIG1)* expression levels  
387 peak at the G2/M transition. Arabidopsis plants overexpressing *OSD1/GIG1* accumulate  
388 CYCB1;<sup>29</sup>. We detect an upregulation of two B-type cyclins in the HPT and HTT cells  
389 suggesting a similar effect (Figure 4).

390

391 Two CDK subunit (CKS) proteins are upregulated in the HPT and HTT datasets. CKS  
392 work as scaffold proteins that serve as adaptors for targeting CDKS to mitotic substrates  
393 but in contrast to cyclins, are not required for proper phosphorylation activity<sup>69-71</sup>.

394

395 Two CDK Inhibitors (CKIs), belonging to different groups are DE in the HPT and HTT  
396 datasets. GRMZMM2G013463, which encodes for an uncharacterized SIAMESE gene  
397 (SIM) is upregulated in HPT, and a Kip-Related protein (KRP) ZmKRP3, which is  
398 upregulated in HTT dataset. ZmKRP3 belongs to a class of KRPs exclusively present in  
399 monocotyledonous plants and presents motifs required for the interaction with CDKs  
400 and D-type cyclins, shows a PEST sequence required for targeted degradation and does  
401 not present a nuclear localization signal<sup>53</sup>.

402

403 In Arabidopsis, there is a concentration-dependent role of ICK/KRPs in blocking both  
404 the G1/S cell cycle and entry into mitosis but allowing S-phase progression promoting a  
405 switch to endoreduplication<sup>72</sup>. Several of the best-characterized SIAMESE (SIM) and  
406 SIAMESE RELATED (SMR) proteins are also involved in the regulation of the  
407 transition from the mitotic cell cycle to endoreplication<sup>72,73</sup>. This poses the question if  
408 the two distinct CKI upregulated in the different tumorous cell types are inducing  
409 different outcomes to give place to hyperplastic or hypertrophic phenotypes. At least our  
410 data clearly indicate that nuclear size, which can be proportionally related to  
411 endoreduplication, of mesophyll cells infected with SG200 or SG200 $\Delta$ see1 is increased  
412 while bundle sheath nuclear sizes remain unchanged (Figure 5). This supports the  
413 concept of hypertrophy in mesophylls cells being linked to endoreduplication.

414

#### 415 **The Pre-Replication complex (pre-RC, before S-phase)**

416

417 The pre-RC is a very important part of the cell cycle as it defines the origins to initiate  
418 DNA replication, regulates DNA replication and assures that each daughter cell receives  
419 identical DNA copies<sup>51</sup>. Pre-RC members are conserved in all eukaryotes and previous  
420 studies have shown that plants core DNA replication machinery is more similar to  
421 vertebrates than single celled yeasts<sup>25-27</sup>. The pre-RC consist of an initiator to establish  
422 the site of replication initiation (ORC), a helicase to unwind DNA (MCM complex),  
423 and CDC6 and CDT1, which act synergistically to load the MCM complex<sup>25,51</sup>. The  
424 formation of a pre-replication complex (pre-RC) is a key control mechanism occurring  
425 before cells enter S-phase<sup>51</sup>.

426

427 Our analysis shows that DE genes from the core DNA replication genes are found in  
428 three of the five datasets (Figures 6 and 7 and Supplementary Table 4), the HPT dataset  
429 (11 genes), HTT (22 genes), and SeeTC.vs.HTT (3 genes). In the HPT dataset we found

430 exclusively upregulated ORC5, ORC6, CDC6, CDT1 (b), SLD5, POLE1, RFC1 and  
431 RPA1; additionally PSF1 and PCNA1, which are downregulated. In HTT we found  
432 exclusively upregulated genes including ORC2, MCM3, MCM4, MCM5, MCM7,  
433 MCM10, TOPBP1 (MEI1), POLA3, POLA4, POLD1, POLD3, RFC2, RFC3, RFC4,  
434 RPA1, RPA2 and RPA3<sup>25,51</sup>. POLA2 lays down a short RNA/DNA primer in the  
435 lagging strand synthesis<sup>25</sup>, and is upregulated in both HPT and HTT datasets. Finally,  
436 the comparison of SeeTC.vs.HTT showed a shared upregulation of RPA2 with the HTT  
437 and a unique and strong downregulation for one RPA1 gene (Figure 6), both necessary  
438 to stabilize single stranded DNA. In summary, the HTT shows an upregulation of  
439 almost all the elements necessary for DNA replication, a characteristic behavior of cells  
440 going through endoreduplication (Figure 7).

441

#### 442 **The Skp1/Cullin1/F-box complex (SCF) and SGT1 interactors**

443

444 The effector protein See1 is transferred from biotrophic *U. maydis* hyphae into the  
445 cytoplasm and, in particular to the nucleus of the host cell<sup>8</sup>. A yeast- 2hybrid (Y2H)  
446 screen identified a maize homologue of SGT1 (suppressor of G2 allele of *skp1*) as its  
447 partner/target in maize<sup>8</sup>. SGT1 was originally identified as a cell cycle regulator  
448 necessary for the kinetochore formation in yeast<sup>74</sup>. It regulates the cell cycle together  
449 with Skp1 in two ways, by regulating Skp1 function in the Skp1/Cullin1/F-box complex  
450 (SCF), an ubiquitin ligase that controls the degradation of cell cycle regulators to allow  
451 G1-to-S transition, and by promoting the assembly of the centromere-binding complex  
452 that initiates kinetochore formation<sup>74,75</sup>.

453

454 Due to the important role of SCF in cell cycle regulation and the interaction of one of its  
455 subunits (SGT1) with See1, we decided to explore the expression of genes encoding for  
456 its components, additionally we included the 359 F-box genes reported by Jia et al.,  
457 2013<sup>76</sup>. F-box genes are crucial components of the SCF-ubiquitin ligases and confer  
458 substrate specificity, therefore, the higher the number of F-box proteins the more  
459 increases the number of potential SCF complexes. Our analysis showed DE genes  
460 encoding for SCF subunits in four out of five datasets (Figure 8). We observe  
461 upregulation of SGT1 in the HPT (Figure 8A). This observation might be relevant  
462 considering that See1 interacts with SGT1 and such interaction may have an impact on  
463 cell cycle as no hyperplastic cells are formed in maize leaves infected with  
464 SG200 $\Delta$ see1<sup>4</sup>. In contrast, a general absence of SCF-complex activation is observed in  
465 SG200 $\Delta$ see1 compared to SG200 infected mesophyll cells (Figure 8B and 8C).

466

467 8 F-box genes are upregulated in HPT and 11 F-box genes deregulated in the HTT  
468 dataset, from which two are strongly downregulated (Table III). In the seeTC dataset, 3  
469 F-box genes were strongly upregulated (Table III). One DE F-box gene (ZmFBX154.1),  
470 upregulated in the HPT dataset, has been reported to respond to multiple stresses and  
471 may participate in the crosstalk between different signal transduction pathways<sup>76</sup>. The  
472 specific function of the majority of the F-box genes in plants remains unclear and only  
473 ZmFBX92, which is not DE in our datasets, has been functionally characterized<sup>64,76</sup>.

474

475 In summary, no strong expression changes in the SCF components were observed in the  
476 HPT and HTT datasets (Figure 8), but DE F-box genes were detected (Table III).  
477 Interestingly, only two F-box genes are both common and upregulated between the HPT  
478 and HTT datasets suggesting that the majority of the selective interactions of the SCF  
479 complex are specific for each tumor-type. As a consequence, the abundance of key

480 regulatory proteins, among them proteins involved in the regulation of cell cycle, is  
481 likely specific for each tumor-type. We conclude that among the DE F-box genes strong  
482 candidates involved in the regulation of cell cycle can be found.

483

#### 484 **The Small ubiquitin-like modifier (SUMO) and the SUMOylation machinery**

485

486 SUMOylation is a post-translational modification that consists of the covalent  
487 attachment of a SUMO to a substrate protein<sup>77</sup>. SUMOylation regulates the activity of  
488 several proteins involved in critical cellular processes such as cell division and  
489 transcriptional regulation<sup>77,78</sup>. In yeast the SUMO-conjugating enzyme Ubc9 plays a  
490 role in the degradation of S and M-phase cyclins, and the ubiquitin-like specific  
491 protease ULP1, is essential for the G2 to M phase transition<sup>79,80</sup>. Furthermore, aberrant  
492 SUMOylation of key cell signaling proteins, including tumor suppressors and  
493 oncogenes result in deregulation of cell cycle and division, which ultimately leads to  
494 cancer<sup>81</sup>. In human cells, it was recently shown that SUMOylation of the APC4 subunit  
495 of the APC/C E3 ubiquitin-ligase is crucial for accurate progression of cells through  
496 mitosis; furthermore, SUMOylation increases APC/C ubiquitylation activity toward a  
497 subset of its targets<sup>82,83</sup>. In plants, SUMOylation has been implicated in several  
498 physiological responses and plays an important role to control cell cycle progression<sup>84-</sup>  
499 <sup>87</sup>. Particularly, the SUMO-E3-ligase AtMMS21 dissociates the E2Fa/DPa complex  
500 regulating in this way the G1/S cell cycle progression<sup>88</sup>.

501

502 Genes involved in the SUMO machinery are differentially expressed in both HPT and  
503 HTT (Supplementary Table 5). In the HPT dataset the only upregulated gene encodes  
504 for a SUMO conjugating enzyme subunit 1 (f) (ZmSCE1f, |log2FC| 2.59). In the HTT  
505 three SUMO machinery components are upregulated, a SUMO-variant (SUMO-V,  
506 |log2FC| 1.78), ZmSce1f (|log2FC| 1.76) and a SUMO ligase (SIZ1c, |log2FC| 2.63).  
507 From the three DE SUMO machinery members only ZmSce1f enzymatic function has  
508 been confirmed, while ZmSUMO-v and ZmSiz1c remain to be tested.

509

#### 510 **Discussion**

511

512 The full maize transcriptome analysis of SG200 infected mesophyll and bundle sheath  
513 cells has provided us a deeper view in the mechanisms evoked in the formation of maize  
514 leaf tumor. Expected responses, such as the alteration of genes involved in the  
515 regulation and performance of cell cycle, were differentially regulated in particular  
516 tumor cell types. Interestingly, some of the mechanisms observed differed between cell  
517 types and mostly reflected the cell behavior (i.e hyperplastic or hypertrophic). In  
518 comparison to the wealth of information and studies performed in mammals or yeast,  
519 plant cell cycle still requires a lot of study and homologues functionality validation.  
520 Such studies are complicated since in plants large families encode for cell cycle  
521 regulators<sup>25,26</sup>. It has been suggested that the evolution of larger families coding for  
522 CDKs and cyclins might help to provide a new layer of substrate recognition to  
523 coordinate the cell cycle with developmental cues<sup>27</sup>. More difficulties arise due to  
524 inconsistent nomenclatures, which difficult the comparisons and analysis<sup>27</sup>. A  
525 reductionist vision or description of the maize cell cycle would be simply not correct  
526 due to the lack of information/characterization of many genes. Most of the here reported  
527 genes still require a functional confirmation. However, this report gives some pointers  
528 to promising genes that could shed some light on cell cycles processes, i.e.  
529 endoreduplication. The identification of functional homologues that keep the network

530 topology to control cell cycle will be crucial for the advance and understanding of this  
531 process in maize and other plants. Furthermore, previous comparative studies between  
532 plants and humans have identified putative cancer genes<sup>89</sup>. Such studies aim to identify  
533 conserved proliferation genes based on expression and transcriptional regulation in  
534 healthy tissues. Our study now provides data on cell cycle related genes in a tumorous  
535 tissue. Therefore we believe it provides promising candidates to understand  
536 tumorigenesis.

537

### 538 **Regulation of cell cycle and core-DNA replication machineries by *U. maydis*** 539 **infection**

540

541 In plants the analysis of cell cycle mutants has revealed that the loss of cell proliferation  
542 control is not sufficient to induce tumor development<sup>24</sup>. Furthermore, plants tolerate  
543 fluctuations in cell proliferation rates without this promoting tumor formation<sup>24</sup>.

544

545 Transcriptional activation of replication proteins (i.e. pre-replication complex) can  
546 induce endoreduplication<sup>90</sup>. Two *E2F* coding genes and one *DPA* gene are upregulated  
547 in HTT (Table II). The heterodimer E2F-DP promotes the expression of S-phase genes.  
548 Additionally, the majority of the components required for DNA replication are  
549 upregulated in the HTT dataset (Figures 5 and 6); this is in agreement with the  
550 hypertrophic phenotype observed<sup>4</sup>. Additionally, *DPA* expression levels have been also  
551 reported to correlate positively with final leaf size traits<sup>64</sup>. The RBR protein family is  
552 crucial and defined as a core cell cycle control by repressing G1/S phase cell cycle  
553 progression. RBR is known as a tumor suppressor and is inactivated in many human  
554 cancers<sup>24</sup>. Two *RBR* maize genes have been well characterized<sup>66,67</sup>, *ZmRBR1* has a  
555 canonical function as repressor of cell cycle progression while *ZmRBR3* promotes the  
556 expression of the E2F/DP targets, including the MCM family, required for the initiation  
557 of DNA synthesis<sup>67</sup>. Our analysis showed a strong upregulation of *ZmRBR4* and  
558 *ZmRBR3* in both tumor cell types but no alterations in *ZmRBR1/2* gene expressions  
559 (Table II and Figure 4). *ZmRBR4* has not yet been characterized but its strong  
560 expression in both tumor cell-types rather speaks for a positive role in cell cycle  
561 progression.

562 *CKS2* is upregulated in the hypertrophic HTT cells. *CKS2* is frequently overexpressed  
563 in human cancers and other malignancies and such overexpression overrides the intra-  
564 S-phase checkpoint that blocks DNA replication in response to replication stress<sup>91,92</sup>, it  
565 is tempting to speculate that similar to human cancers, *CKS2* upregulation allows DNA  
566 replication in despite the replication stress.

567

568 In eukaryotes there exists an overall similar topology controlling the entry into S-phase,  
569 while the control of mitosis through CDK phosphorylation-dephosphorylation cycles  
570 appears more diversified<sup>27</sup>. This reflects what we observe in our datasets where HTT  
571 “behaviour” fits with the predicted models while the hyperplastic cells or HPT, more  
572 dependent in rapid mitotic phases, is somehow more difficult to describe or predict  
573 based on the current observations, and therefore the pattern is more difficult to be  
574 described.

575

576 Endoreduplication can be achieved by elimination of mitosis promoting components in  
577 the presence of persistent DNA replication<sup>90</sup>. Several plant biotrophs induce localized  
578 host endoreduplication by activating common mechanisms that include the anaphase-  
579 promoting complex and modulation of core cell cycle transcriptional machinery<sup>93</sup>.

580 Despite being a common mechanism in biotroph-plant interactions, little is known about  
581 the host proteins and mechanisms manipulated by the biotroph as well as the effectors  
582 involved<sup>93</sup>. The hypertrophic (HTT) cells present an upregulation of several D-type  
583 cyclins, E2F-DP, ZmRBR3/4 and the full pre-replication machinery, all necessary to  
584 support a persistent DNA replication. In this paper we shed some light on potential  
585 host protein candidates and the role of the *U. maydis* effector See1 in the stimulation of  
586 the endoreduplication process.

587

588 SGT1 is a protein that takes part in two important complexes, HSP90-RAR1-SGT1 and  
589 the SCF-E3 ubiquitin-ligase. HSP90-RAR1-SGT1 is essential in NLR-mediated  
590 immune responses and mostly localized in the cytoplasm<sup>94</sup>. On the other hand, SCF-E3  
591 ubiquitin-ligase is crucial for the degradation of proteins involved in the regulation of  
592 cell cycle, and therefore mostly acting in the nucleus<sup>75</sup>. The upregulation of SGT1 in the  
593 HPT cells and the induction of hyperplasia in BS cells, a phenotype clearly absent in the  
594 maize leaves infected with SG200 $\Delta$ see1, suggest that somehow the cell is reading out  
595 an absence of the SGT1 component, which could be due to “sequestration” via See1. It  
596 is tempting to speculate that See1 somehow fosters the localization of SGT1 into the  
597 nucleus, thus promoting the formation of the SCF-complex. Another possibility is that  
598 by occluding the phosphorylation site in SGT1<sup>8</sup>, See1 somehow fosters SGT1  
599 interaction with SCF components instead of the HSP90-RAR1-SGT1 complex. This in  
600 addition would have on top the advantage of avoiding programmed cell death.

601

### 602 **SUMOylation machinery is induced in hyperplastic cells**

603

604 In animal models, hyperplasia can result from the reactivation of pathways involved in  
605 embryonic development and suppression of terminal differentiation<sup>95</sup>. In humans,  
606 gathering evidence shows a close relationship between SUMOylation and cancer  
607 development, including progression and metastasis, with direct evidence that the  
608 deregulation of the SUMO-pathway affects the proper function of several oncogenes  
609 and tumor suppressor genes<sup>96</sup>. Furthermore, the SUMO machinery has been proposed as  
610 a cancer biomarker to determine malignant tissues and cancer progression<sup>97</sup>. Our  
611 transcriptome analysis suggests that, like in animals, the SUMO machinery members  
612 are specifically deregulated in oncogenic tissues.

613

614 ZmSCE1f is a representative isotype II of the SCE E2, this isotype is exclusively found  
615 in cereals<sup>98</sup>. Remarkably, all isotype II E2s were abundant in dividing tissues hinting a  
616 role during cell division<sup>98</sup>. We observe an upregulation of ZmSCE1f in both tumorous  
617 cell types, hypertrophic mesophyll cells (HTT) and hyperplastic bundle sheath cells  
618 (HPT); remarkably, such upregulation is stronger in the highly dividing hyperplastic  
619 cells, further supporting its role in cell division.

620

621 In maize, five SUMOs have been identified, three canonical SUMO genes including an  
622 identical duplication of SUMO1 (SUMO1a and SUMO1b) and SUMO2, an  
623 evolutionarily conserved SUMO variant (SUMO-v), and the cereal-specific DiSUMO-  
624 LIKE (DSUL)<sup>98-100</sup>. SUMO-v proteins are most closely related to the fungal/animal  
625 Rad60-Esc2-Nip45 (RENi) family, which is involved in DNA damage repair<sup>101</sup>. In  
626 maize, SUMO-v is expressed at moderate levels in all tissues, but little is known about  
627 its function<sup>98</sup>. Due to the conservation of interaction surfaces as the SUMO-Interacting  
628 Motif (SIM, which allows noncovalent interaction with SUMO) and  $\beta$ -grasp fold it has

629 been suggested that SUMO-v may work as a recruiting partner or scaffold protein  
630 providing a surface for protein-protein interactions<sup>98</sup>.

631

632 SIZ1c encodes for a SAP and MIZ/SP-RING type ligase and presents substantial  
633 sequence alterations affecting the PHD domain and C-terminal region, with minimal  
634 changes to the SAP and MIZ/SP-RING domains<sup>98</sup>. Since PHD domain is important for  
635 target recognition and ZmSIZ1c is highly expressed in the endosperm it is likely that  
636 such target substrates are endosperm specific<sup>98</sup>. ZmSiz1c is exclusively upregulated in  
637 HTT cells; whether similar target substrates normally expressed in the endosperm are  
638 awakening in the leaf tumor cells remain to be explored.

639

#### 640 **Additional Information**

641

#### 642 **Acknowledgments**

643

644 This work was funded by the German Research Foundation (DFG; DO 1421/3-1) and  
645 the Cluster of excellence on Plant Science (CEPLAS).

646

#### 647 **Author contributions**

648

649 MV, AM and GD contributed conception and design of the study; MV, AH and CE  
650 performed the bioinformatics and statistical analysis; MV wrote the first draft; MV and  
651 GD wrote and edited the manuscript. All authors contributed to manuscript revision,  
652 read and approved the submitted version.

653

#### 654 **Competing interests**

655

656 The author(s) declare no competing interests.

657

#### 658 **Supporting Information**

659

660 Additional Supporting Information may be found in the online version of this article.

661

662 **Figure S1** Chloroplast

663 **Figure S2** Starch – Sucrose

664 **Figure S3** Cell wall precursors

665 **Figure S4** Lignin synthesis

666 **Dataset S1.** List of expressed maize genes in all six datasets including estimated counts,  
667 fold-changes and adjusted p-values

668 **Dataset S2.** Singular Enrichment Analysis (SEA) and Parametric Analysis of Gene set  
669 Enrichment (PAGE)

670 **Dataset S3.** Singular Enrichment Analysis (SEA) and Parametric Analysis of Gene set  
671 Enrichment (PAGE) of unique genes

672 **Table S1.** GO enrichment terms with maximum percentage of genes shared between  
673 HPT and HTT datasets

674 **Table S2.** Unique GO enrichment terms in the HTT and seeTC datasets

675 **Table S3.** Core Cell Cycle Genes

676 **Table S2.** Core DNA Replication Machinery Genes

677 **Table S3.** SUMOylation components

678

679 **References**

- 680 1. Djamei, A. *et al.* Metabolic priming by a secreted fungal effector. *Nature* **478**,  
681 395–398 (2011).
- 682 2. Hemetsberger, C., Herrberger, C., Zechmann, B., Hillmer, M. & Doehlemann,  
683 G. The *Ustilago maydis* Effector Pep1 Suppresses Plant Immunity by Inhibition of Host  
684 Peroxidase Activity. *PLoS Pathog.* **8**, e1002684 (2012).
- 685 3. Kämper, J. *et al.* Insights from the genome of the biotrophic fungal plant  
686 pathogen *Ustilago maydis*. *Nature* **444**, 97–101 (2006).
- 687 4. Matei, A. *et al.* How to make a tumour: cell type specific dissection of *Ustilago*  
688 *maydis*-induced tumour development in maize leaves. *New Phytol.* **217**, 1681–1695  
689 (2018).
- 690 5. van der Linde, K. *et al.* A Maize Cystatin Suppresses Host Immunity by  
691 Inhibiting Apoplastic Cysteine Proteases. *Plant Cell* **24**, 1285–1300 (2012).
- 692 6. Mueller, O. *et al.* The secretome of the maize pathogen *Ustilago maydis*. *Fungal*  
693 *Genet. Biol.* **45**, S63–S70 (2008).
- 694 7. Mueller, A. N., Ziemann, S., Treitschke, S., Aßmann, D. & Doehlemann, G.  
695 Compatibility in the *Ustilago maydis*–Maize Interaction Requires Inhibition of Host  
696 Cysteine Proteases by the Fungal Effector Pit2. *PLoS Pathog.* **9**, e1003177 (2013).
- 697 8. Redkar, A. *et al.* A Secreted Effector Protein of *Ustilago maydis* Guides Maize  
698 Leaf Cells to Form Tumors. *Plant Cell* **27**, 1332–1351 (2015).
- 699 9. Schilling, L., Matei, A., Redkar, A., Walbot, V. & Doehlemann, G. Virulence of  
700 the maize smut *Ustilago maydis* is shaped by organ-specific effectors. *Mol. Plant*  
701 *Pathol.* **15**, 780–789 (2014).
- 702 10. Skibbe, D. S., Doehlemann, G., Fernandes, J. & Walbot, V. Maize Tumors  
703 Caused by *Ustilago maydis* Require Organ-Specific Genes in Host and Pathogen.  
704 *Science* **328**, 89–92 (2010).
- 705 11. Tanaka, S. *et al.* A secreted *Ustilago maydis* effector promotes virulence by  
706 targeting anthocyanin biosynthesis in maize. *eLife* (2014). doi:10.7554/eLife.01355
- 707 12. Callow, J. A. & Ling, I. T. Histology of neoplasms and chlorotic lesions in  
708 maize seedlings following the injection of sporidia of *Ustilago maydis* (DC) Corda.  
709 *Physiol. Plant Pathol.* **3**, 489–490 (1973).
- 710 13. Banuett, F. & Herskowitz, I. Discrete developmental stages during teliospore  
711 formation in the corn smut fungus, *Ustilago maydis*. *Development* **122**, 2965–2976  
712 (1996).
- 713 14. Matei, A. & Doehlemann, G. Cell biology of corn smut disease — *Ustilago*  
714 *maydis* as a model for biotrophic interactions. *Curr. Opin. Microbiol.* **34**, 60–66 (2016).
- 715 15. Doehlemann, G. *et al.* Reprogramming a maize plant: transcriptional and  
716 metabolic changes induced by the fungal biotroph *Ustilago maydis*. *Plant J.* **56**, 181–  
717 195 (2008).
- 718 16. Basse, C. W. Dissecting Defense-Related and Developmental Transcriptional  
719 Responses of Maize during *Ustilago maydis* Infection and Subsequent Tumor  
720 Formation. *PLANT Physiol.* **138**, 1774–1784 (2005).
- 721 17. Gao, L., Kelliher, T., Nguyen, L. & Walbot, V. *Ustilago maydis* reprograms cell  
722 proliferation in maize anthers. *Plant J.* **75**, 903–914 (2013).
- 723 18. Horst, R. J. *et al.* *Ustilago maydis* Infection Strongly Alters Organic Nitrogen  
724 Allocation in Maize and Stimulates Productivity of Systemic Source Leaves. *PLANT*  
725 *Physiol.* **152**, 293–308 (2010).
- 726 19. Vollmeister, E. *et al.* Fungal development of the plant pathogen *Ustilago*  
727 *maydis*. *FEMS Microbiol. Rev.* **36**, 59–77 (2012).

- 728 20. Kretschmer, M., Croll, D. & Kronstad, J. W. Maize susceptibility to *Ustilago*  
729 *maydis* is influenced by genetic and chemical perturbation of carbohydrate allocation.  
730 *Mol. Plant Pathol.* **18**, 1222–1237 (2017).
- 731 21. Wenzler, H. & Meins, F. Persistent changes in the proliferative capacity of  
732 maize leaf tissues induced by *Ustilago* infection. *Physiol. Mol. Plant Pathol.* **30**, 309–  
733 319 (1987).
- 734 22. Horst, R. J., Engelsdorf, T., Sonnewald, U. & Voll, L. M. Infection of maize  
735 leaves with *Ustilago maydis* prevents establishment of C4 photosynthesis. *J. Plant*  
736 *Physiol.* **165**, 19–28 (2008).
- 737 23. Jung, J. K., Kebrom, T. H., Turgeon, R. & Brutnell, T. P. Anatomical  
738 differences in the bundle sheath and mesophyll cells of maize seedlings across a leaf  
739 developmental gradient. *Maize Meeting* (2008). Available at:  
740 [https://www.maizegdb.org/maize\\_meeting/2008/](https://www.maizegdb.org/maize_meeting/2008/).
- 741 24. Doonan, J. H. & Sablowski, R. Walls around tumours — why plants do not  
742 develop cancer. *Nat. Rev. Cancer* **10**, 794–802 (2010).
- 743 25. Shultz, R. W., Tatineni, V. M., Hanley-Bowdoin, L. & Thompson, W. F.  
744 Genome-Wide Analysis of the Core DNA Replication Machinery in the Higher Plants  
745 *Arabidopsis* and Rice. *PLANT Physiol.* **144**, 1697–1714 (2007).
- 746 26. Vandepoele, K. Genome-Wide Analysis of Core Cell Cycle Genes in  
747 *Arabidopsis*. *PLANT CELL ONLINE* **14**, 903–916 (2002).
- 748 27. Harashima, H., Dissmeyer, N. & Schnittger, A. Cell cycle control across the  
749 eukaryotic kingdom. *Trends Cell Biol.* **23**, 345–356 (2013).
- 750 28. Inzé, D. & De Veylder, L. Cell Cycle Regulation in Plant Development. *Annu.*  
751 *Rev. Genet.* **40**, 77–105 (2006).
- 752 29. Eloy, N. B., de Freitas Lima, M., Ferreira, P. C. G. & Inzé, D. The Role of the  
753 Anaphase-Promoting Complex/Cyclosome in Plant Growth. *Crit. Rev. Plant Sci.* **34**,  
754 487–505 (2015).
- 755 30. Buendía-Monreal, M. *et al.* The family of maize D-type cyclins: genomic  
756 organization, phylogeny and expression patterns. *Physiol. Plant.* **143**, 297–308 (2011).
- 757 31. Genschik, P., Marrocco, K., Bach, L., Noir, S. & Criqui, M.-C. Selective protein  
758 degradation: a rheostat to modulate cell-cycle phase transitions. *J. Exp. Bot.* **65**, 2603–  
759 2615 (2014).
- 760 32. Noir, S. *et al.* The Control of *Arabidopsis thaliana* Growth by Cell Proliferation  
761 and Endoreplication Requires the F-Box Protein FBL17. *Plant Cell* **27**, 1461–1476  
762 (2015).
- 763 33. Dante, R. A., Larkins, B. A. & Sabelli, P. A. Cell cycle control and seed  
764 development. *Front. Plant Sci.* **5**, (2014).
- 765 34. Sabelli, P. A. *et al.* Control of cell proliferation, endoreduplication, cell size, and  
766 cell death by the retinoblastoma-related pathway in maize endosperm. *Proc. Natl. Acad.*  
767 *Sci.* **110**, E1827–E1836 (2013).
- 768 35. Bray, N. L., Pimentel, H., Melsted, P. & Pachter, L. Near-optimal probabilistic  
769 RNA-seq quantification. *Nat. Biotechnol.* **34**, 525–527 (2016).
- 770 36. Schnable, P. S. *et al.* The B73 Maize Genome: Complexity, Diversity, and  
771 Dynamics. *Science* **326**, 1112–1115 (2009).
- 772 37. Pimentel, H., Bray, N. L., Puente, S., Melsted, P. & Pachter, L. Differential  
773 analysis of RNA-seq incorporating quantification uncertainty. *Nat. Methods* **14**, 687–  
774 690 (2017).
- 775 38. Benjamini, Y. & Hochberg, Y. Controlling the False Discovery Rate: A  
776 Practical and Powerful Approach to Multiple Testing. *J. R. Stat. Soc. Ser. B Methodol.*  
777 **57**, 289–300 (1995).



- 778 39. Tian, T. *et al.* agriGO v2.0: a GO analysis toolkit for the agricultural  
779 community, 2017 update. *Nucleic Acids Res.* **45**, W122–W129 (2017).
- 780 40. Thimm, O. *et al.* mapman: a user-driven tool to display genomics data sets onto  
781 diagrams of metabolic pathways and other biological processes. *Plant J.* **37**, 914–939  
782 (2004).
- 783 41. Usadel, B. *et al.* A guide to using MapMan to visualize and compare Omics data  
784 in plants: a case study in the crop species, Maize. *Plant Cell Environ.* **32**, 1211–1229  
785 (2009).
- 786 42. Fisher, R. A. On the Interpretation of  $\chi^2$  from Contingency Tables, and the  
787 Calculation of P. *J. R. Stat. Soc.* **85**, 87–94 (1922).
- 788 43. Redkar, A., Matei, A. & Doehlemann, G. Insights into Host Cell Modulation  
789 and Induction of New Cells by the Corn Smut *Ustilago maydis*. *Front. Plant Sci.* **8**,  
790 (2017).
- 791 44. Penning, B. W. *et al.* Genetic Resources for Maize Cell Wall Biology. *PLANT*  
792 *Physiol.* **151**, 1703–1728 (2009).
- 793 45. Carpita, N. C. & McCann, M. C. The Maize Mixed-Linkage (1->3),(1->4)-  
794 -D-Glucan Polysaccharide Is Synthesized at the Golgi Membrane. *PLANT Physiol.* **153**,  
795 1362–1371 (2010).
- 796 46. Vanholme, R., Demedts, B., Morreel, K., Ralph, J. & Boerjan, W. Lignin  
797 Biosynthesis and Structure. *PLANT Physiol.* **153**, 895–905 (2010).
- 798 47. Liu, Q. *et al.* Lignins: Biosynthesis and Biological Functions in Plants. *Int. J.*  
799 *Mol. Sci.* **19**, 335 (2018).
- 800 48. Gutierrez, C. The Arabidopsis Cell Division Cycle. *Arab. Book* **7**, e0120 (2009).
- 801 49. Ach, R. A. *et al.* RRB1 and RRB2 encode maize retinoblastoma-related proteins  
802 that interact with a plant D-type cyclin and geminivirus replication protein. *Mol. Cell.*  
803 *Biol.* **17**, 5077–5086 (1997).
- 804 50. Avramova, V. *et al.* Drought Induces Distinct Growth Response, Protection, and  
805 Recovery Mechanisms in the Maize Leaf Growth Zone. *Plant Physiol.* **169**, 1382–1396  
806 (2015).
- 807 51. Brasil, J. N., Costa, C. N. M., Cabral, L. M., Ferreira, P. C. G. & Hemerly, A. S.  
808 The plant cell cycle: Pre-Replication complex formation and controls. *Genet. Mol. Biol.*  
809 **40**, 276–291 (2017).
- 810 52. Colasanti, J., Tyers, M. & Sundaresan, V. p34cdc2 Isolation and characterization  
811 of cDNA clones encoding a functional homologue from *Zea mays*. *Cell Biol.* **5** (1991).
- 812 53. Godínez-Palma, S. K. *et al.* Two maize Kip-related proteins differentially  
813 interact with, inhibit and are phosphorylated by cyclin D–cyclin-dependent kinase  
814 complexes. *J. Exp. Bot.* **68**, 1585–1597 (2017).
- 815 54. Grafí, G. *et al.* A maize cDNA encoding a member of the retinoblastoma protein  
816 family: involvement in endoreduplication. *Proc. Natl. Acad. Sci.* **93**, 8962–8967 (1996).
- 817 55. Hsieh, W.-L. & Wolniak, S. M. Isolation and characterization of a functional A-  
818 type cyclin from maize. **9** (1998).
- 819 56. Kakumanu, A. *et al.* Effects of Drought on Gene Expression in Maize  
820 Reproductive and Leaf Meristem Tissue Revealed by RNA-Seq. *PLANT Physiol.* **160**,  
821 846–867 (2012).
- 822 57. Renaudin, J. P., Colasanti, J., Rime, H., Yuan, Z. & Sundaresan, V. Cloning of  
823 four cyclins from maize indicates that higher plants have three structurally distinct  
824 groups of mitotic cyclins. *Proc. Natl. Acad. Sci.* **91**, 7375–7379 (1994).
- 825 58. Rossi, V. *et al.* A maize histone deacetylase and retinoblastoma-related protein  
826 physically interact and cooperate in repressing gene transcription. **13** (2003).

- 827 59. Rymen, B. *et al.* Cold Nights Impair Leaf Growth and Cell Cycle Progression in  
828 Maize through Transcriptional Changes of Cell Cycle Genes. *PLANT Physiol.* **143**,  
829 1429–1438 (2007).
- 830 60. Sun, Y., Flannigan, B. A. & Setter, T. L. Regulation of endoreduplication in  
831 maize (*Zea mays* L.) endosperm. Isolation of a novel B1-type cyclin and its quantitative  
832 analysis. *14* (1999).
- 833 61. Xie, Q., Sanz-Burgos, A. P., Hannon, G. J. & Gutiérrez, C. Plant cells contain a  
834 novel member of the retinoblastoma family of growth regulatory proteins. *EMBO J.* **15**,  
835 4900–4908 (1996).
- 836 62. Hu, X. *et al.* Genome-wide analysis of cyclins in maize (*Zea mays*). *Genet. Mol.*  
837 *Res.* **9**, 1490–1503 (2010).
- 838 63. Sabelli, P. A., Dante, R. A., Nguyen, H. N., Gordon-Kamm, W. J. & Larkins, B.  
839 A. Expression, regulation and activity of a B2-type cyclin in mitotic and  
840 endoreduplicating maize endosperm. *Front. Plant Sci.* **5**, (2014).
- 841 64. Baute, J. *et al.* F-Box Protein FBX92 Affects Leaf Size in *Arabidopsis thaliana*.  
842 *Plant Cell Physiol.* **58**, 962–975 (2017).
- 843 65. Kalve, S., De Vos, D. & Beemster, G. T. S. Leaf development: a cellular  
844 perspective. *Front. Plant Sci.* **5**, (2014).
- 845 66. Sabelli, P. A. *et al.* RBR3, a member of the retinoblastoma-related family from  
846 maize, is regulated by the RBR1/E2F pathway. *Proc. Natl. Acad. Sci.* **102**, 13005–  
847 13012 (2005).
- 848 67. Sabelli, P. A. *et al.* Positive regulation of minichromosome maintenance gene  
849 expression, DNA replication, and cell transformation by a plant retinoblastoma gene.  
850 *Proc. Natl. Acad. Sci.* **106**, 4042–4047 (2009).
- 851 68. Sabelli, P. A. & Larkins, B. A. Grasses Like Mammals? Redundancy and  
852 Compensatory Regulation within the Retinoblastoma Protein Family. *Cell Cycle* **5**,  
853 352–355 (2006).
- 854 69. Boruc, J. *et al.* Systematic Localization of the *Arabidopsis* Core Cell Cycle  
855 Proteins Reveals Novel Cell Division Complexes. *PLANT Physiol.* **152**, 553–565  
856 (2010).
- 857 70. Boudolf, V., Rombauts, S., Naudts, M., Inzé, D. & De Veylder, L. Identification  
858 of novel cyclin-dependent kinases interacting with the CKS1 protein of *Arabidopsis*. *J.*  
859 *Exp. Bot.* **52**, 1381–1382 (2001).
- 860 71. Menges, M., Jager, S. M. D., Gruissem, W. & Murray, J. A. H. Global analysis  
861 of the core cell cycle regulators of *Arabidopsis* identifies novel genes, reveals multiple  
862 and highly specific profiles of expression and provides a coherent model for plant cell  
863 cycle control. *Plant J.* **41**, 546–566 (2005).
- 864 72. Churchman, M. L. *et al.* SIAMESE, a Plant-Specific Cell Cycle Regulator,  
865 Controls Endoreplication Onset in *Arabidopsis thaliana*. *PLANT CELL ONLINE* **18**,  
866 3145–3157 (2006).
- 867 73. Kumar, N. *et al.* Functional Conservation in the SIAMESE-RELATED Family  
868 of Cyclin-Dependent Kinase Inhibitors in Land Plants. *Plant Cell* **27**, 3065–3080  
869 (2015).
- 870 74. Kitagawa, K., Skowyra, D., Elledge, S. J., Harper, J. W. & Hieter, P. SGT1  
871 Encodes an Essential Component of the Yeast Kinetochore Assembly Pathway and a  
872 Novel Subunit of the SCF Ubiquitin Ligase Complex. *Mol. Cell* **4**, 21–33 (1999).
- 873 75. Rodrigo-Brenni, M. C., Thomas, S., Bouck, D. C. & Kaplan, K. B. Sgt1p and  
874 Skp1p Modulate the Assembly and Turnover of CBF3 Complexes Required for Proper  
875 Kinetochore Function. *Mol. Biol. Cell* **15**, 3366–3378 (2004).

- 876 76. Jia, F., Wu, B., Li, H., Huang, J. & Zheng, C. Genome-wide identification and  
877 characterisation of F-box family in maize. *Mol. Genet. Genomics* **288**, 559–577 (2013).
- 878 77. Johnson, E. S. Protein Modification by SUMO. *Annu. Rev. Biochem.* **73**, 355–  
879 382 (2004).
- 880 78. Gill, G. Something about SUMO inhibits transcription. *Curr. Opin. Genet. Dev.*  
881 **15**, 536–541 (2005).
- 882 79. Seufert, W., Futcher, B. & Jentsch, S. Role of a ubiquitin-conjugating enzyme in  
883 degradation of S- and M-phase cyclins. *Nature* **373**, 78–81 (1995).
- 884 80. Li, S.-J. & Hochstrasser, M. A new protease required for cell-cycle progression  
885 in yeast. *Nature* **398**, 246–251 (1999).
- 886 81. Eifler, K. & Vertegaal, A. C. O. SUMOylation-Mediated Regulation of Cell  
887 Cycle Progression and Cancer. *Trends Biochem. Sci.* **40**, 779–793 (2015).
- 888 82. Eifler, K. *et al.* SUMO targets the APC/C to regulate transition from metaphase  
889 to anaphase. *Nat. Commun.* **9**, (2018).
- 890 83. Lee, C. C., Li, B., Yu, H. & Matunis, M. J. Sumoylation promotes optimal  
891 APC/C activation and timely anaphase. *eLife* (2018). doi:10.7554/eLife.29539
- 892 84. Miura, K. *et al.* The Arabidopsis SUMO E3 ligase SIZ1 controls phosphate  
893 deficiency responses. *Proc. Natl. Acad. Sci.* **102**, 7760–7765 (2005).
- 894 85. van den Burg, H. A., Kini, R. K., Schuurink, R. C. & Takken, F. L. W.  
895 *Arabidopsis* Small Ubiquitin-Like Modifier Paralogs Have Distinct Functions in  
896 Development and Defense. *Plant Cell* **22**, 1998–2016 (2010).
- 897 86. Murtas, G. A Nuclear Protease Required for Flowering-Time Regulation in  
898 Arabidopsis Reduces the Abundance of SMALL UBIQUITIN-RELATED MODIFIER  
899 Conjugates. *PLANT CELL ONLINE* **15**, 2308–2319 (2003).
- 900 87. Villajuana-Bonequi, M. *et al.* Elevated salicylic acid levels conferred by  
901 increased expression of ISOCHORISMATE SYNTHASE 1 contribute to  
902 hyperaccumulation of SUMO1 conjugates in the Arabidopsis mutant early in short days  
903 4. *Plant J.* **79**, 206–219 (2014).
- 904 88. Liu, Y. *et al.* The Arabidopsis SUMO E3 Ligase AtMMS21 Dissociates the  
905 E2Fa/DPa Complex in Cell Cycle Regulation. *Plant Cell* **28**, 2225–2237 (2016).
- 906 89. Quimbaya, M. *et al.* Identification of putative cancer genes through data  
907 integration and comparative genomics between plants and humans. *Cell. Mol. Life Sci.*  
908 **69**, 2041–2055 (2012).
- 909 90. De Veylder, L., Beeckman, T. & Inzé, D. The ins and outs of the plant cell  
910 cycle. *Nat. Rev. Mol. Cell Biol.* **8**, 655–665 (2007).
- 911 91. Liberal, V. *et al.* Cyclin-dependent kinase subunit (Cks) 1 or Cks2  
912 overexpression overrides the DNA damage response barrier triggered by activated  
913 oncoproteins. *Proc. Natl. Acad. Sci.* **109**, 2754–2759 (2012).
- 914 92. You, H., Lin, H. & Zhang, Z. Cks2 in human cancers: Clinical roles and current  
915 perspectives (Review). *Mol. Clin. Oncol.* **3**, 459–463 (2015).
- 916 93. Wildermuth, M. C., Steinwand, M. A., McRae, A. G., Jaenisch, J. & Chandran,  
917 D. Adapted Biotroph Manipulation of Plant Cell Ploidy. *Annu. Rev. Phytopathol.* **55**,  
918 537–564 (2017).
- 919 94. Kadota, Y., Shirasu, K. & Guerois, R. NLR sensors meet at the SGT1–HSP90  
920 crossroad. *Trends Biochem. Sci.* **35**, 199–207 (2010).
- 921 95. Lee, S. *et al.* Alterations of Gene Expression in the Development of Early  
922 Hyperplastic Precursors of Breast Cancer. *Am. J. Pathol.* **171**, 252–262 (2007).
- 923 96. Lee, J. S., Choi, H. J. & Baek, S. H. Sumoylation and Its Contribution to Cancer.  
924 in *SUMO Regulation of Cellular Processes* (ed. Wilson, V. G.) 283–298 (Springer  
925 International Publishing, 2017). doi:10.1007/978-3-319-50044-7\_17

- 926 97. Mattosco, D. & Chiocca, S. SUMO pathway components as possible cancer  
 927 biomarkers. *Future Oncol.* **11**, 1599–1610 (2015).  
 928 98. Augustine, R. C., York, S. L., Rytz, T. C. & Vierstra, R. D. Defining the SUMO  
 929 System in Maize: SUMOylation Is Up-Regulated during Endosperm Development and  
 930 Rapidly Induced by Stress. *Plant Physiol.* **171**, 2191–2210 (2016).  
 931 99. Srilunchang, K., Krohn, N. G. & Dresselhaus, T. DiSUMO-like DSUL is  
 932 required for nuclei positioning, cell specification and viability during female  
 933 gametophyte maturation in maize. *Development* **137**, 333–345 (2010).  
 934 100. Chen, J. *et al.* DiSUMO-LIKE Interacts with RNA-Binding Proteins and Affects  
 935 Cell-Cycle Progression during Maize Embryogenesis. *Curr. Biol.* **28**, 1548-1560.e5  
 936 (2018).  
 937 101. Novatchkova, M., Bachmair, A., Eisenhaber, B. & Eisenhaber, F. Proteins with  
 938 two SUMO-like domains in chromatin-associated complexes: The RENi (Rad60-Esc2-  
 939 NIP45) family. *BMC Bioinformatics* **9** (2005).  
 940 102. Cavallari, N. *et al.* The cyclin-dependent kinase G group defines a thermo-  
 941 sensitive alternative splicing circuit modulating the expression of Arabidopsis  
 942 ATU2AF65A. *Plant J.* **94**, 1010–1022 (2018).  
 943 103. Venny 2.1.0. Available at: <http://bioinfogp.cnb.csic.es/tools/venny/index.html>.  
 944

945

## 946 Tables

947

948

Table I. Differentially expressed (DE) genes in the six datasets

| Comparison - Dataset | DE genes full <sup>a</sup> | DE genes unique <sup>b</sup> |
|----------------------|----------------------------|------------------------------|
| MBS.vs.HPT           | 8 195                      | 4 553                        |
| MMS.vs.HTT           | 8 356                      | 3 946                        |
| MMS.vs.seeTC         | 764                        | 101                          |
| seeTC.vs.HTT         | 1 803                      | 452                          |
| HPT.vs.HTT           | 77                         | 6                            |

<sup>a</sup> DE genes full contain all genes after applying a threshold of  $|\log_2FC| \geq 1.5$ .

<sup>b</sup> DE genes unique indicates the number of DE genes ( $|\log_2FC| \geq 1.5$ ) that are exclusive for the corresponding dataset.

949

950

951

Table II. DE basic cell cycle machinery genes in the different datasets

| Gene name         | Dataset    |             |       |              | Source of Description                     |
|-------------------|------------|-------------|-------|--------------|-------------------------------------------|
|                   | HPT        | HTT         | seeTC | HTT.vs.seeTC |                                           |
| ZmCYCA3;4         | <b>4.8</b> | 0.8         |       | 0.8          | Kakumanu et al. 2012 <sup>56</sup>        |
| ZmCYCA3;4         | 0.9        | <b>1.6</b>  |       |              | Kakumanu et al. 2012 <sup>56</sup>        |
| ZmCYCA2           | <b>1.5</b> | 0.8         |       |              | Kakumanu et al. 2012 <sup>56</sup>        |
| ZmCYCA3;1         | <b>3.2</b> | <b>2.8</b>  |       |              |                                           |
| CYL1              |            | <b>2.3</b>  |       | <b>2.2</b>   |                                           |
| ZmCYCB2;1         | 0.6        | <b>1.9</b>  |       | <b>1.9</b>   | Renaudin et al. 1994 <sup>57</sup>        |
| CYCB              | <b>2.1</b> | <b>1.7</b>  |       |              |                                           |
| ZmCYCD1;1         | <b>1.5</b> | 1.3         |       | 1.3          | Buendía-Monreal et al. 2011 <sup>30</sup> |
| ZmCYCD5;3a        | 0.1        | <b>2.6</b>  |       | <b>2.6</b>   | Buendía-Monreal et al. 2011 <sup>30</sup> |
| ZmCYD3;1a         | 0.3        | <b>3.0</b>  |       |              | Buendía-Monreal et al. 2011 <sup>30</sup> |
| ZmCYCD3;1b        |            | <b>1.9</b>  |       |              | Buendía-Monreal et al. 2011 <sup>30</sup> |
| ZmCYCD2;1         |            | <b>2.1</b>  |       |              | Buendía-Monreal et al. 2011 <sup>30</sup> |
| CYCP <sup>1</sup> |            | <b>-4.5</b> |       |              |                                           |

|                         |            |            |            |             |                                         |
|-------------------------|------------|------------|------------|-------------|-----------------------------------------|
| CYCP <sup>2</sup>       |            | <b>1.7</b> |            |             |                                         |
| <u>CYCT</u>             | <b>4.3</b> |            |            |             |                                         |
| <u>CDKG<sup>1</sup></u> |            | <b>2.2</b> |            |             |                                         |
| <u>CDKG<sup>2</sup></u> |            | <b>2.4</b> |            |             |                                         |
| CKS                     | <b>2.3</b> | 1.2        |            |             |                                         |
| ZmCKS2                  |            | <b>1.7</b> |            |             | Rymen et al. 2007 <sup>59</sup>         |
| ZmKRP3                  | 0.1        | <b>1.7</b> |            |             | Godínez-Palma et al. 2017 <sup>53</sup> |
| SIM                     | <b>1.6</b> | -0.2       |            | -0.2        |                                         |
| ZmRBR2;1                |            |            |            | <b>-4.8</b> | Ach et al. 1997 <sup>49</sup>           |
| ZmRBR3                  | <b>1.5</b> | <b>1.7</b> |            |             | Sabelli et al. 2005 <sup>66</sup>       |
| RBR4                    | <b>3.3</b> | <b>1.7</b> |            |             |                                         |
| E2F <sup>1</sup>        |            | <b>1.6</b> |            |             |                                         |
| E2F <sup>2</sup>        |            | <b>2.1</b> |            |             |                                         |
| ZmDPA                   | <b>2.6</b> | <b>2.4</b> |            |             | Rymen et al. 2007 <sup>59</sup>         |
| ZmAPC13                 |            | <b>2.5</b> |            | <b>2.5</b>  | Eloy et al. 2015 <sup>29</sup>          |
| ZmCDC20                 | 0.7        | 1.0        | <b>4.0</b> |             | Avramova et al. 2015 <sup>50</sup>      |
| OSD1                    | <b>1.9</b> | <b>1.8</b> |            |             |                                         |

\* All visible genes are DE. Bold numbers highlight the genes with a  $|\log_2FC| \geq 1.5$ . Underlined genes are not directly involved in cell cycle. AtCYCL1 and AtCDKG2 form an active complex in Arabidopsis involved in an alternative splicing mechanism that transduces changes in ambient temperature into DE of a fundamental spliceosome component<sup>102</sup> (Cavallari et al., 2018). MtCYCT and MtCDKC form an active complex that works as a positive regulator of transcription by phosphorylating RNA polymerase II in Medicago. B73 identifiers for not yet described genes: CYCL1=GRMZM2G000706\_T01; CYCB=GRMZM2G061287\_T01; CYCP<sup>1</sup>= GRMZM2G021530\_T01; CYCP<sup>2</sup>= GRMZM2G076468\_T01; CYCT= GRMZM2G308570\_T04; CDKG<sup>1</sup>= GRMZM2G179097\_T03; CDKG<sup>2</sup>= GRMZM2G179097\_T06; CKS= AC149818.2\_FGT004; SIM=GRMZM2G013463\_T01; RBR4=GRMZM2G016997\_T01; E2F<sup>1</sup>= AC233850.1\_FGT005; E2F<sup>2</sup>= GRMZM2G041701\_T01; OSD1=GRMZM2G352274\_T01.

952

953

Table III. DE F-box genes in the different datasets

| Gene name* | B73 identifier    | Dataset |       |       |
|------------|-------------------|---------|-------|-------|
|            |                   | HPT     | HTT   | seeTC |
| ZmFBX166   | GRMZM2G325650_T01 |         | -4.38 |       |
| ZmFBX227.1 | GRMZM2G128215_T01 |         | -4.20 |       |
| ZmFBX4     | GRMZM2G398848_T01 |         | 1.51  |       |
| ZmFBX193   | GRMZM2G037882_T01 |         | 1.51  |       |
| ZmFBX87.2  | GRMZM2G071705_T02 | 2.36    | 1.52  |       |
| ZmFBX211   | GRMZM2G157132_T01 |         | 1.72  |       |
| ZmFBX15    | GRMZM2G100121_T01 | 2.81    | 1.81  |       |
| ZmFBX190.1 | GRMZM2G101036_T01 |         | 1.84  |       |
| ZmFBX168   | GRMZM2G447480_T01 |         | 2.00  |       |
| ZmFBX77    | GRMZM2G441768_T01 |         | 2.55  | 6.53  |
| ZmFBX232   | GRMZM2G151496_T01 |         | 2.93  | 3.65  |
| ZmFBX114.1 | GRMZM2G176340_T01 | 1.56    |       | 5.42  |
| ZmFBX154.1 | GRMZM2G115701_T01 | 1.64    |       |       |
| ZmFBX243   | GRMZM2G402881_T01 | 1.66    |       |       |
| ZmFBX113   | GRMZM2G084035_T01 | 2.19    |       |       |
| ZmFBX182   | GRMZM5G810231_T01 | 2.91    |       |       |
| ZmFBX156   | GRMZM2G110330_T01 | 2.93    |       |       |

\* F-box genes are based on the ones reported by Jia et al., 2013<sup>76</sup>.

954 **Figure legends**

955

956 **Figure 1. RNA sequencing profiling identifies DE genes for each cell-type specific**  
957 **tumor.** A) Number of differentially expressed genes per dataset. Bars represent up and  
958 down-regulated genes in the five pairwise comparisons of cell-type specific mocked  
959 groups against infected. For the last two datasets, seeTC.vs.HTT and HPT.vs.HTT,  
960 HTT was defined as the control group. B) Venn diagram showing the number of shared  
961 and unique DE genes revealed by pairwise comparison<sup>103</sup>.

962

963 **Figure 2 Overrepresentation analyses of DE genes within functional MapMan-Bins**  
964 **categories.** A) Gene function profile of the maize genome (green) compared to the two  
965 *U. maydis* infected maize tissues: mesophyll (orange) and bundle sheath (violet).  
966 Profiles were generated using the 35 major MapMan-bin annotations, from which 28 are  
967 shown. P-Values resulting from exact Fischer tests were corrected for multiple  
968 hypothesis testing using false discovery rate estimates. Asterisk denotes the enriched  
969 bin categories. B) Venn diagrams for the five significant MapMan-bins identified. DE  
970 genes are indicated with numbers and percentage in brackets.

971

972 **Figure 3. Overview of maize metabolic responses to *Ustilago maydis* infection in**  
973 **specific cell-types.** Genes differentially expressed (FDR  $\leq 5\%$ ) are shown **A**, HPT:  
974 Mapped 23299 out of 28034 (some of the data points may be mapped multiple times to  
975 different bins). Visible in this pathway: 2818. **B** HTT: Mapped 22714 out of 27240  
976 (some of the data points may be mapped multiple times to different bins). Visible in this  
977 pathway: 2835. **C** seeTC: Mapped 14429 out of 17311 (some of the data points may be  
978 mapped multiple times to different bins). Visible in this pathway: 1901. **D**  
979 seeTC.vs.HTT: Mapped 24454 out of 29330 (some of the data points may be mapped  
980 multiple times to different bins). Visible in this pathway: 3040. Upregulated transcripts  
981 are shown in red and downregulated transcripts are colored blue.

982

983 **Figure 4. General cell-cycle model highlighting the genes that respond to *Ustilago***  
984 ***maydis* infection.** Cell cycle consist of four phases: G1, S, G2 and M. S-phase  
985 (Synthesis) is where DNA replication takes place, and M-phase (Mitosis), where  
986 nuclear division occurs. G1 and G2 are gap phases where some checkpoints to control  
987 cell cycle progression take place. A more detailed explanation of the cycle is given in  
988 the text. Genes differentially regulated ( $|\log_2FC| \geq 1.5$ ) are shown. Circles at the  
989 beginning of S-phase and middle of G2 and mitosis represent cell-cycle progression  
990 checkpoints. Colors represent gene expression profile: red= upregulated and blue=  
991 downregulated.

992

993 **Figure 5: Cell type-specific nuclear size measurements in leaf tissue sections**  
994 **stained with propidium iodide (PI) at major tumor development stages.** Data shows  
995 nuclear size measurements 4 dpi and 6 dpi in mock treated, SG200 infected and  
996 SG200 $\Delta$ see1 infected PI stained leaf tissue sections. Analyzed cell types included  
997 Mesophyll and resulting hypertrophic tumor cells, as well as bundle sheath cells and  
998 resulting hyperplastic tumor cells. A minimum of 70 nuclei was measured per tissue  
999 type. Results represent the mean  $\pm$  SD from three independent leaf sections per  
1000 biological replicate. Two independent biological experiments were performed. Asterisks  
1001 indicate statistical significance of nuclear size compared to mock treated tissue of the  
1002 same age. P-values were calculated using the unpaired student's t-test; \*\*\*:  $p \leq 0.001$ .

1003

1004 **Figure 6. DE core DNA replication genes in response to *Ustilago maydis* infection**  
1005 **in specific cell-types.** Genes differentially regulated (FDR<5%) are shown. Y axis  
1006 indicates Log2FC.

1007

1008 **Figure 7. DE DNA replication machinery genes in response to *Ustilago maydis***  
1009 **infection in specific cell-types. A HPT. B HTT. C seeTC.** Genes differentially  
1010 regulated (FDR<5%) are shown. Upregulated transcripts are shown in red and  
1011 downregulated transcripts are colored blue.

1012

1013 **Figure 8. DE SCF subunit encoding genes in response to *Ustilago maydis* infection**  
1014 **in specific cell-types. A HPT. B HTT. C seeTC. D SeeTC.vs.HTT.** For the annotation  
1015 of the genes encoding for the subunits HSP90, RAR1, SGT1, CULLIN1, RBX1, E2 and  
1016 SKP1 the Mercator4 v1 program was used. F-box genes and NB-LRR-containing genes  
1017 were based on the lists provided by Jia et al., 2013 and Song et al., 2015 with minimal  
1018 modifications. Upregulated transcripts are shown in red and downregulated transcripts  
1019 are colored blue.

1020

1021

1022

**A**

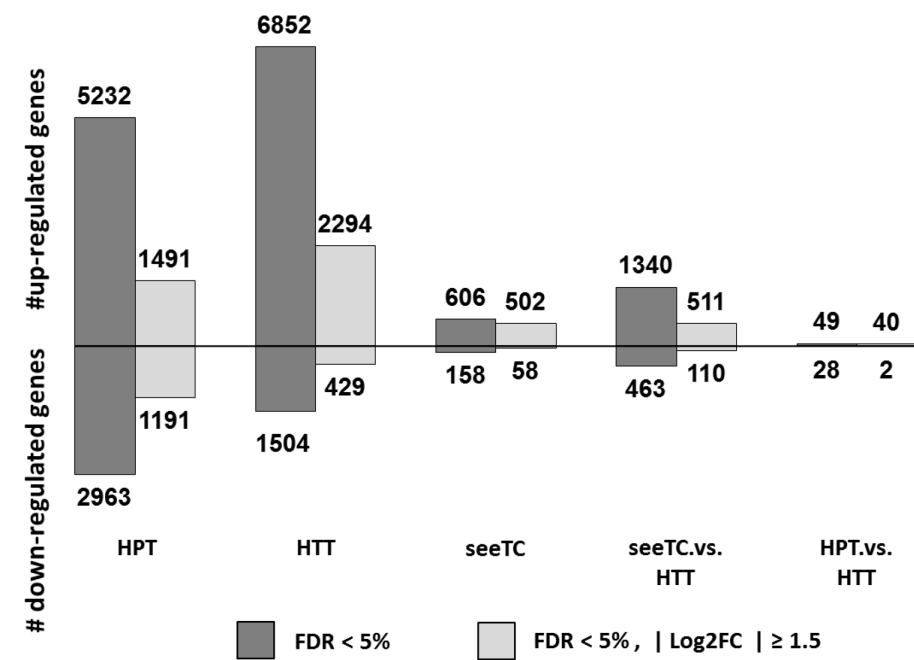

**B**

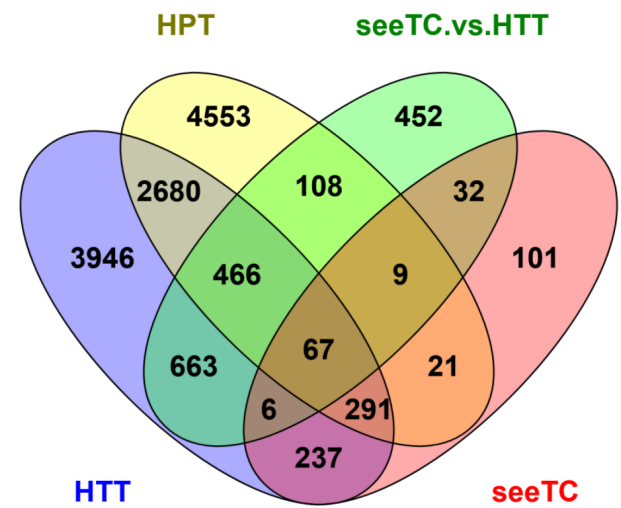



**A**

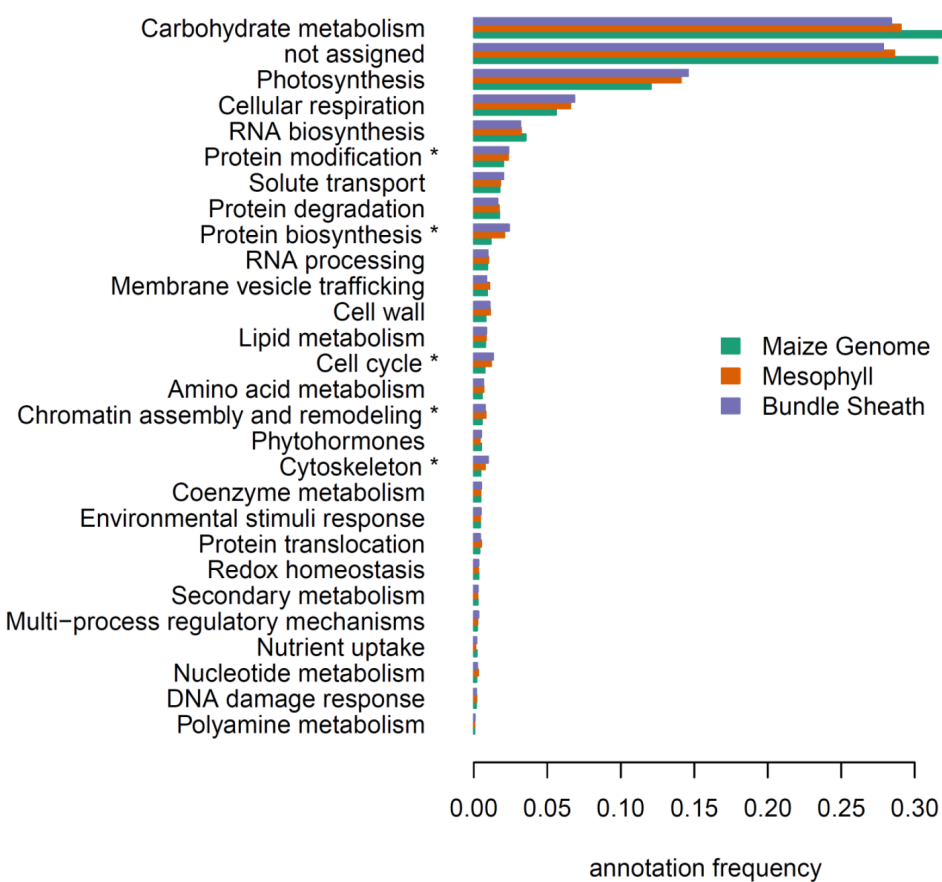

**B**

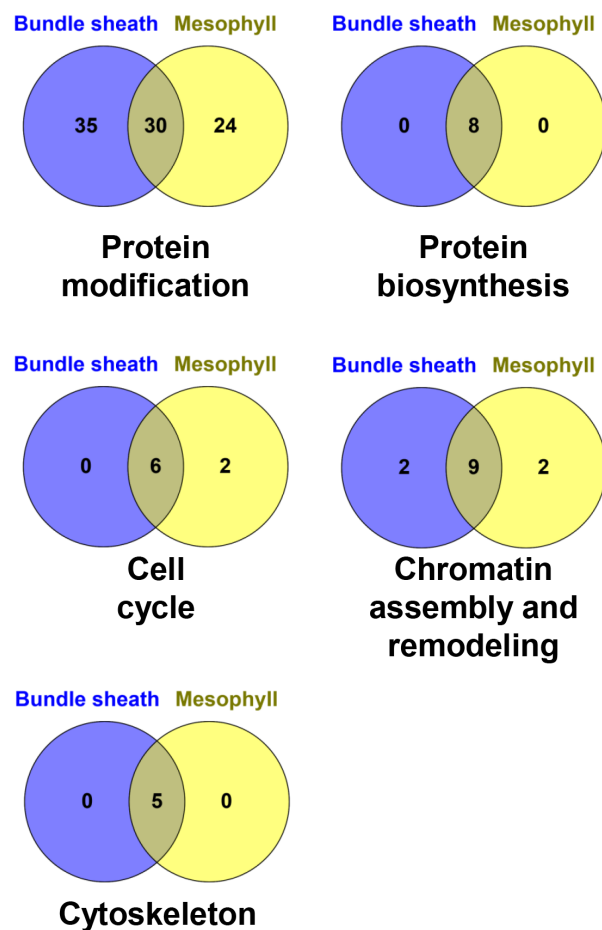

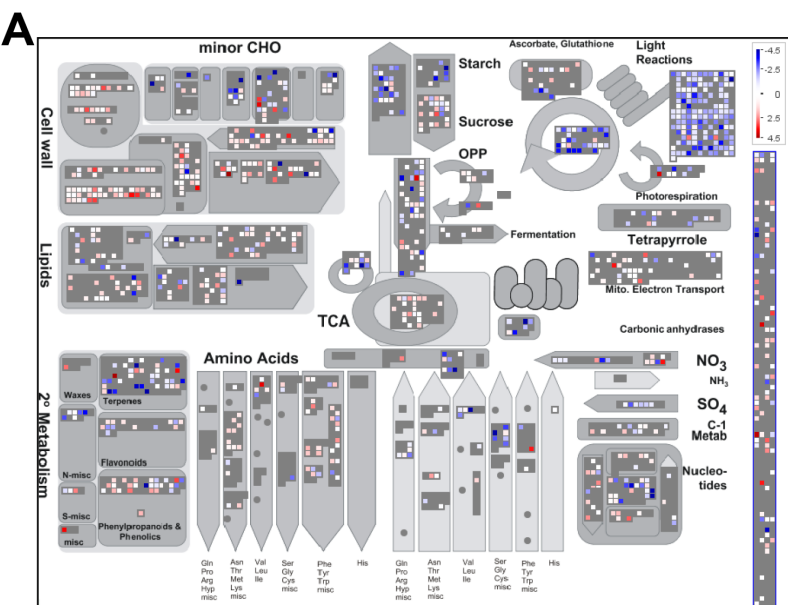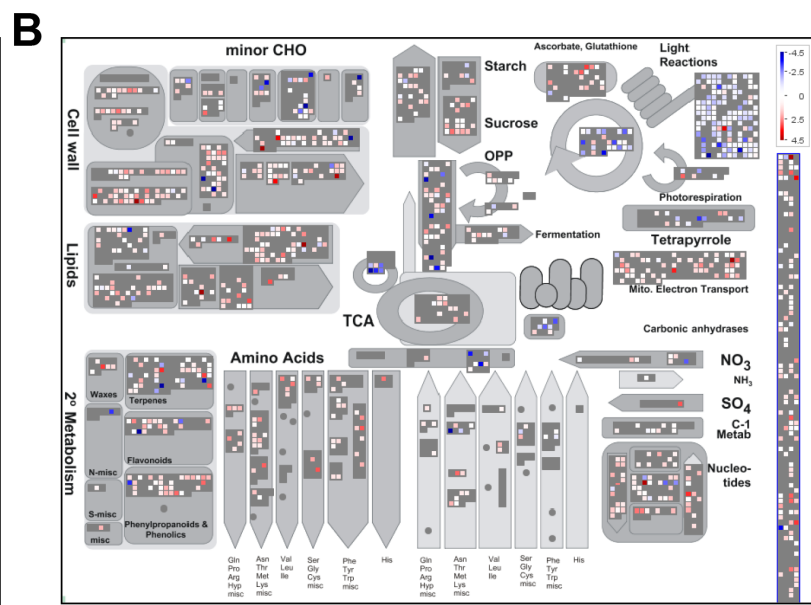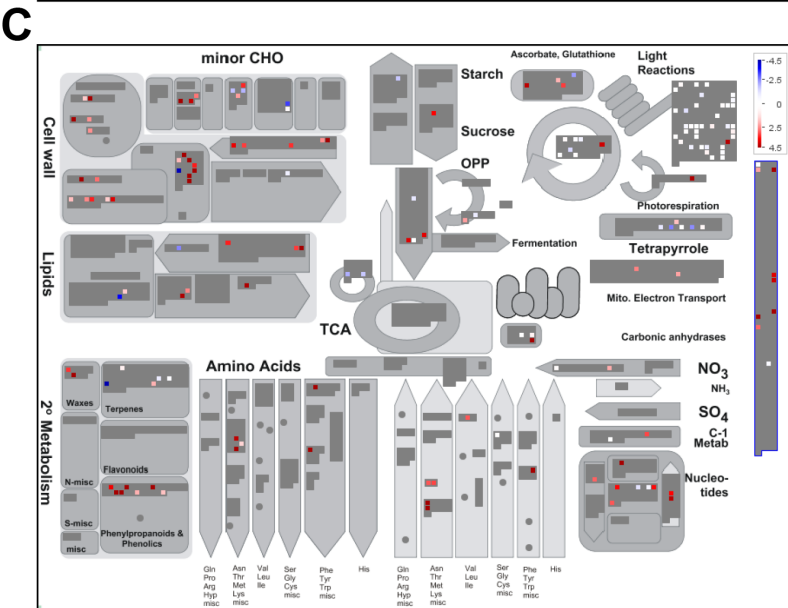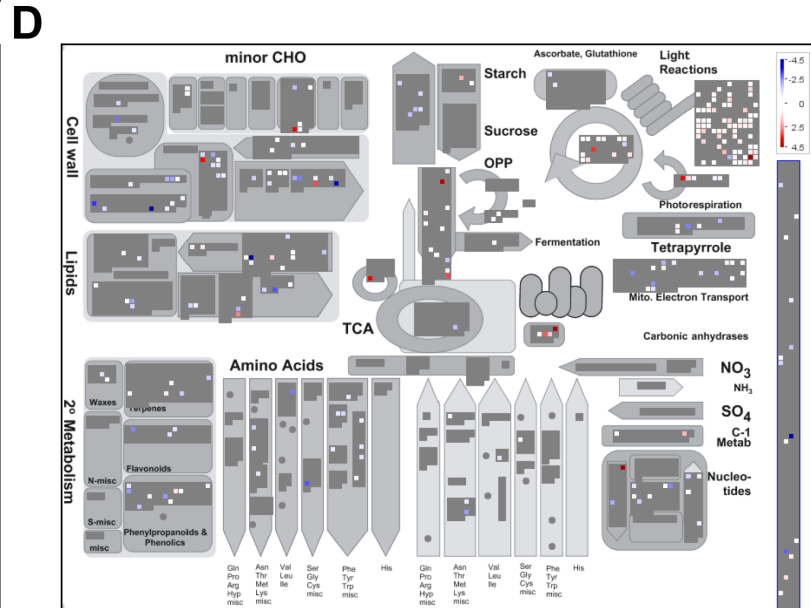

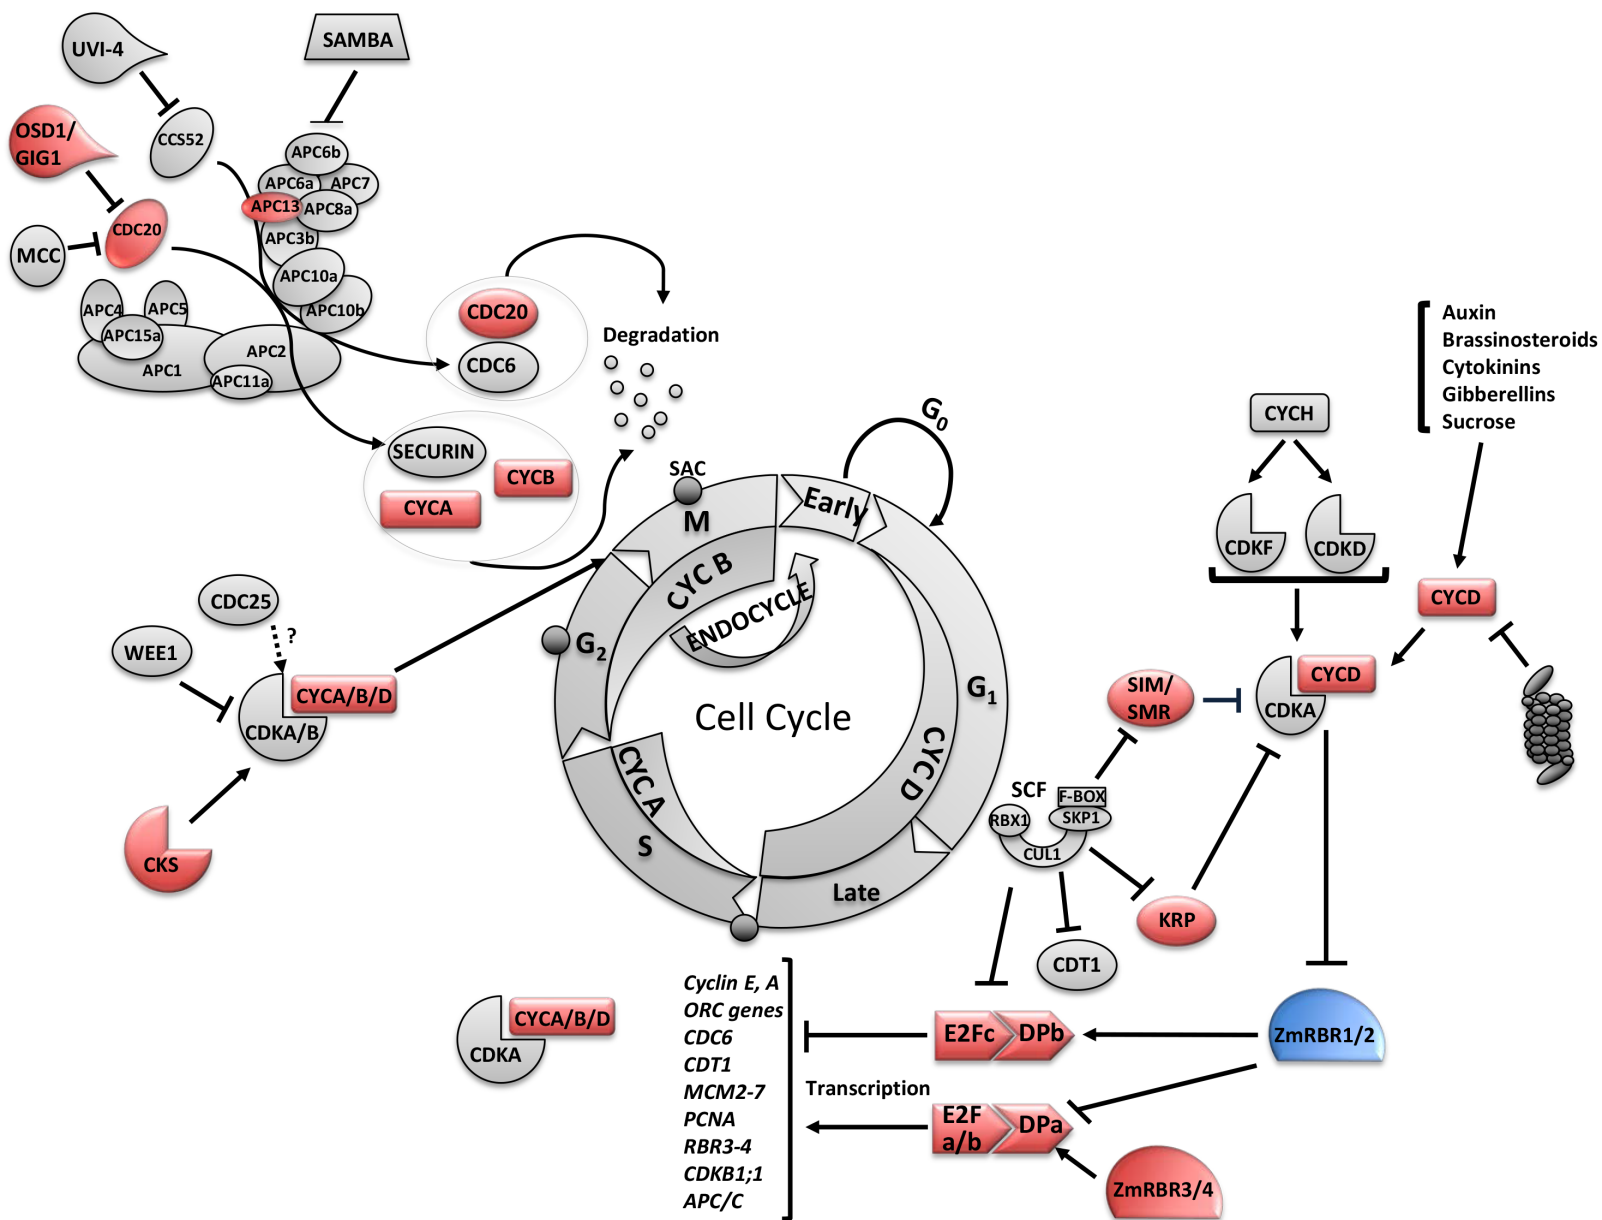

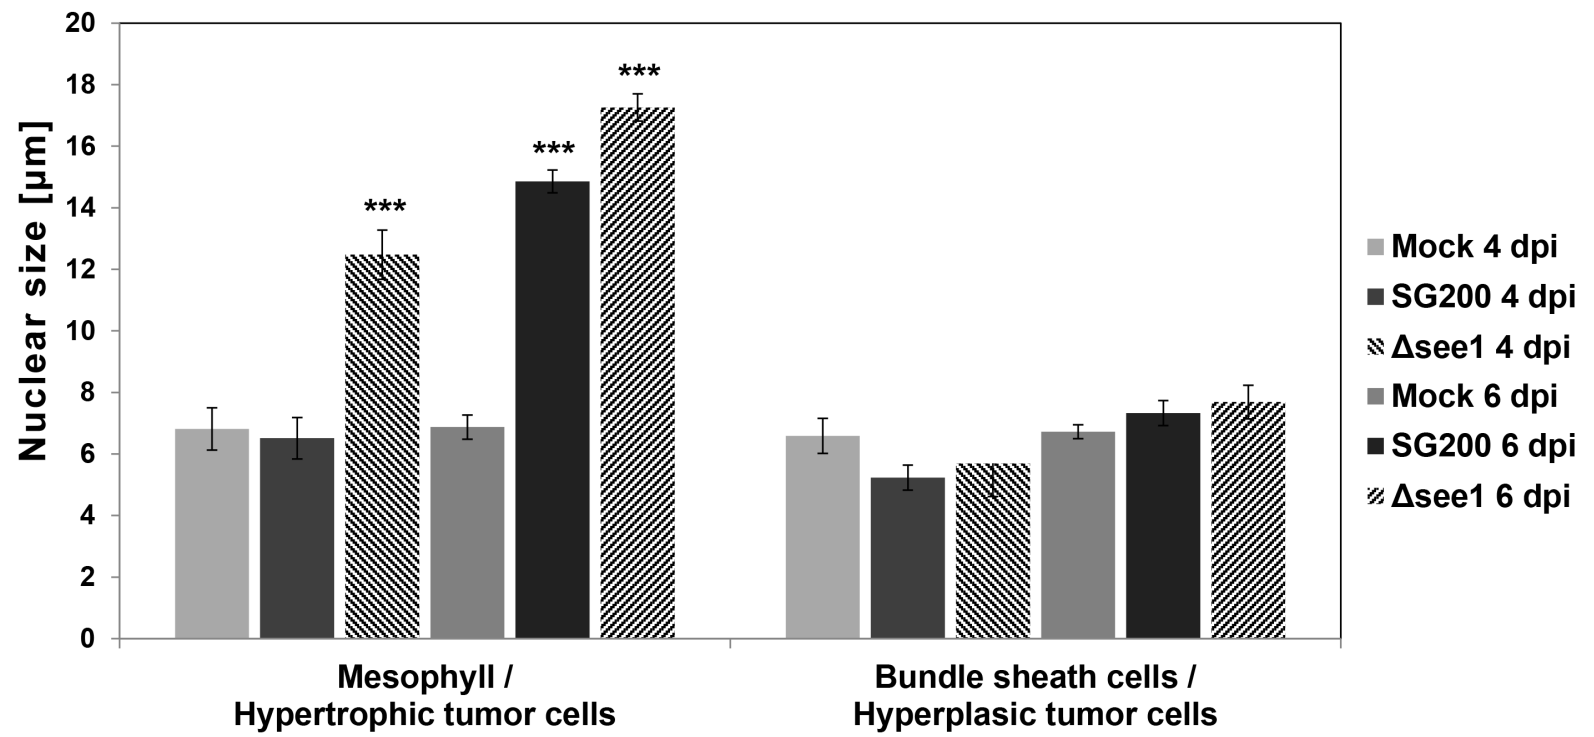

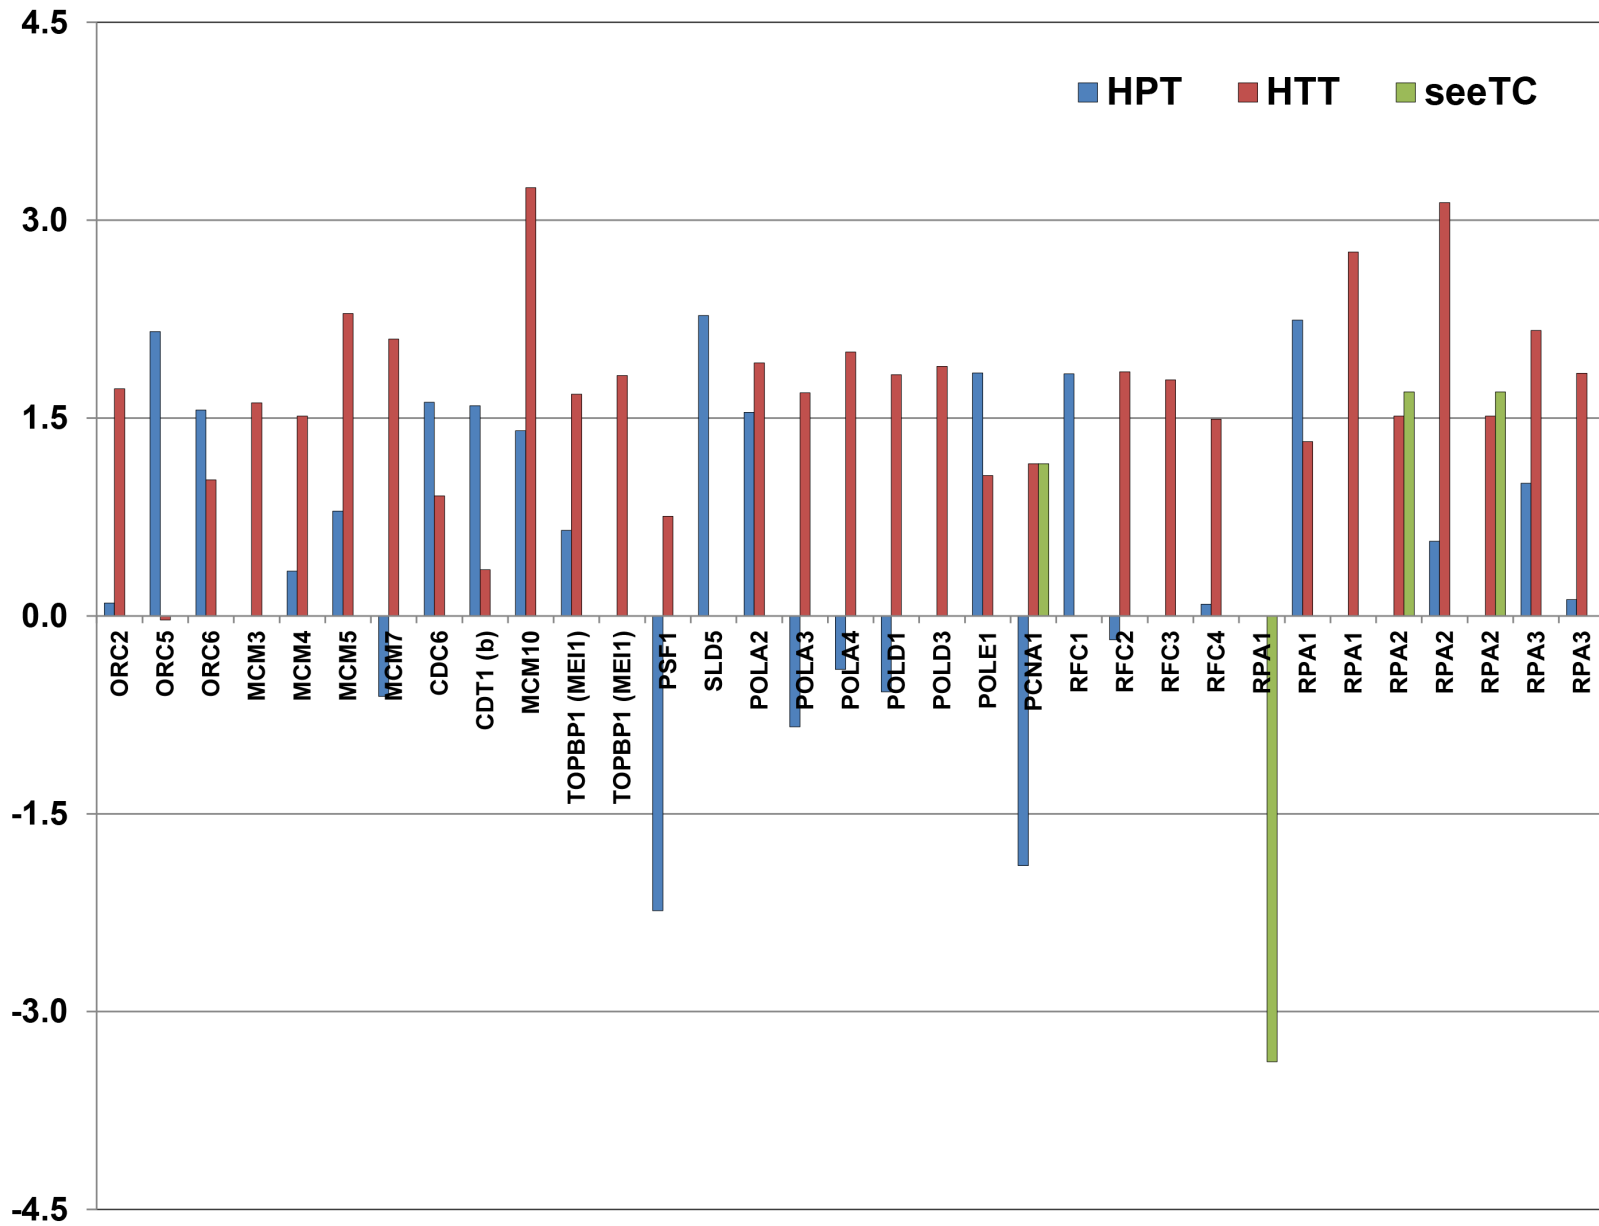

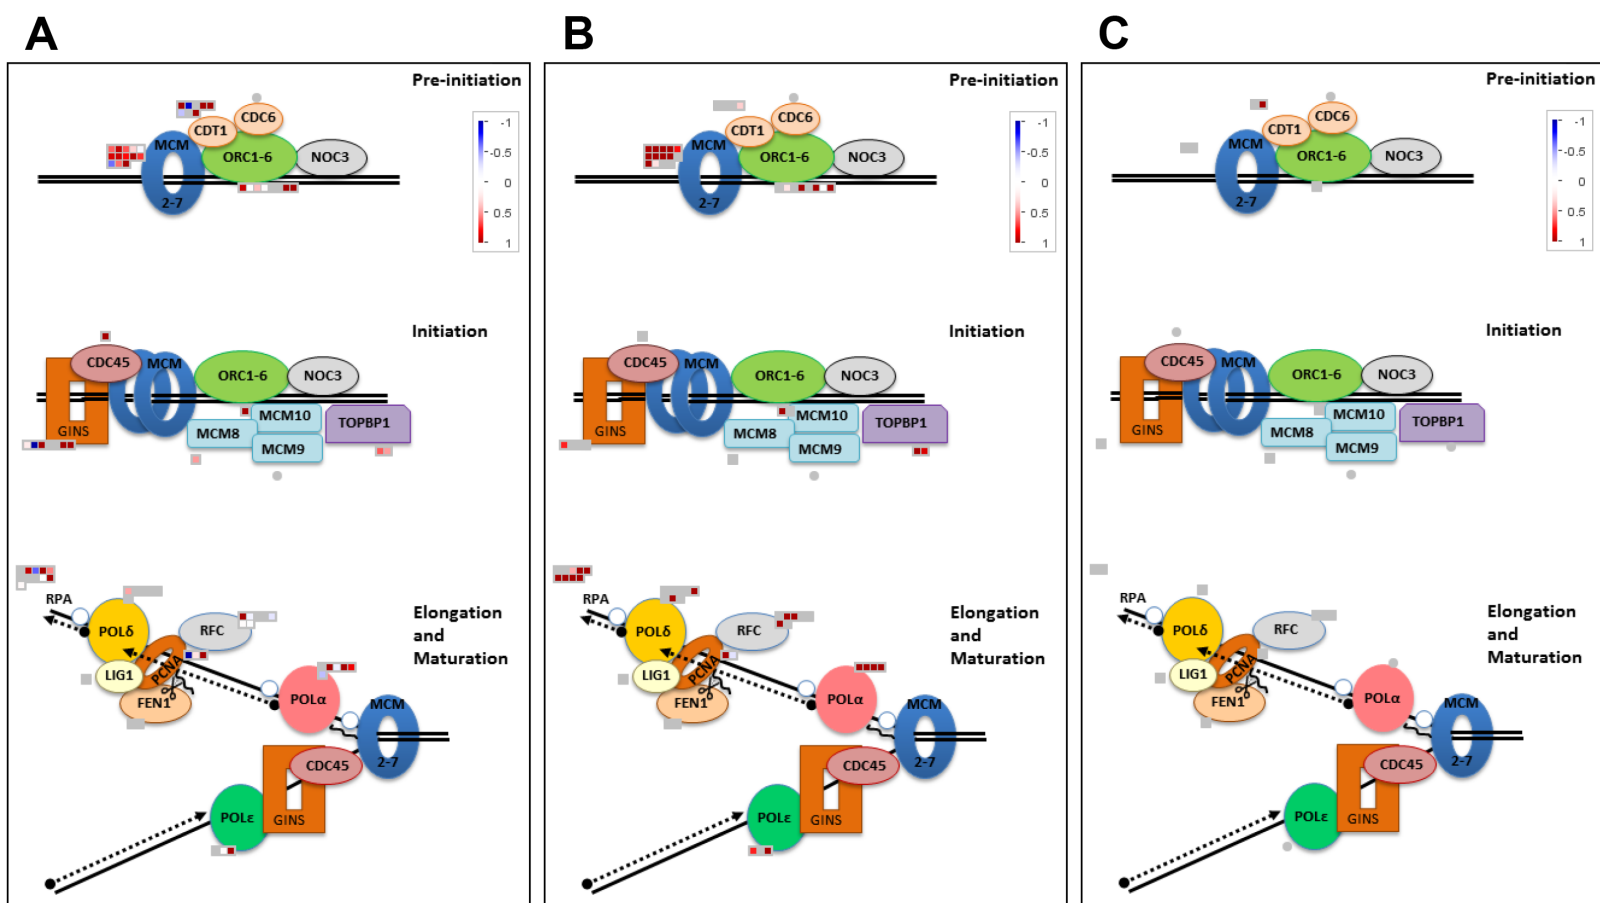

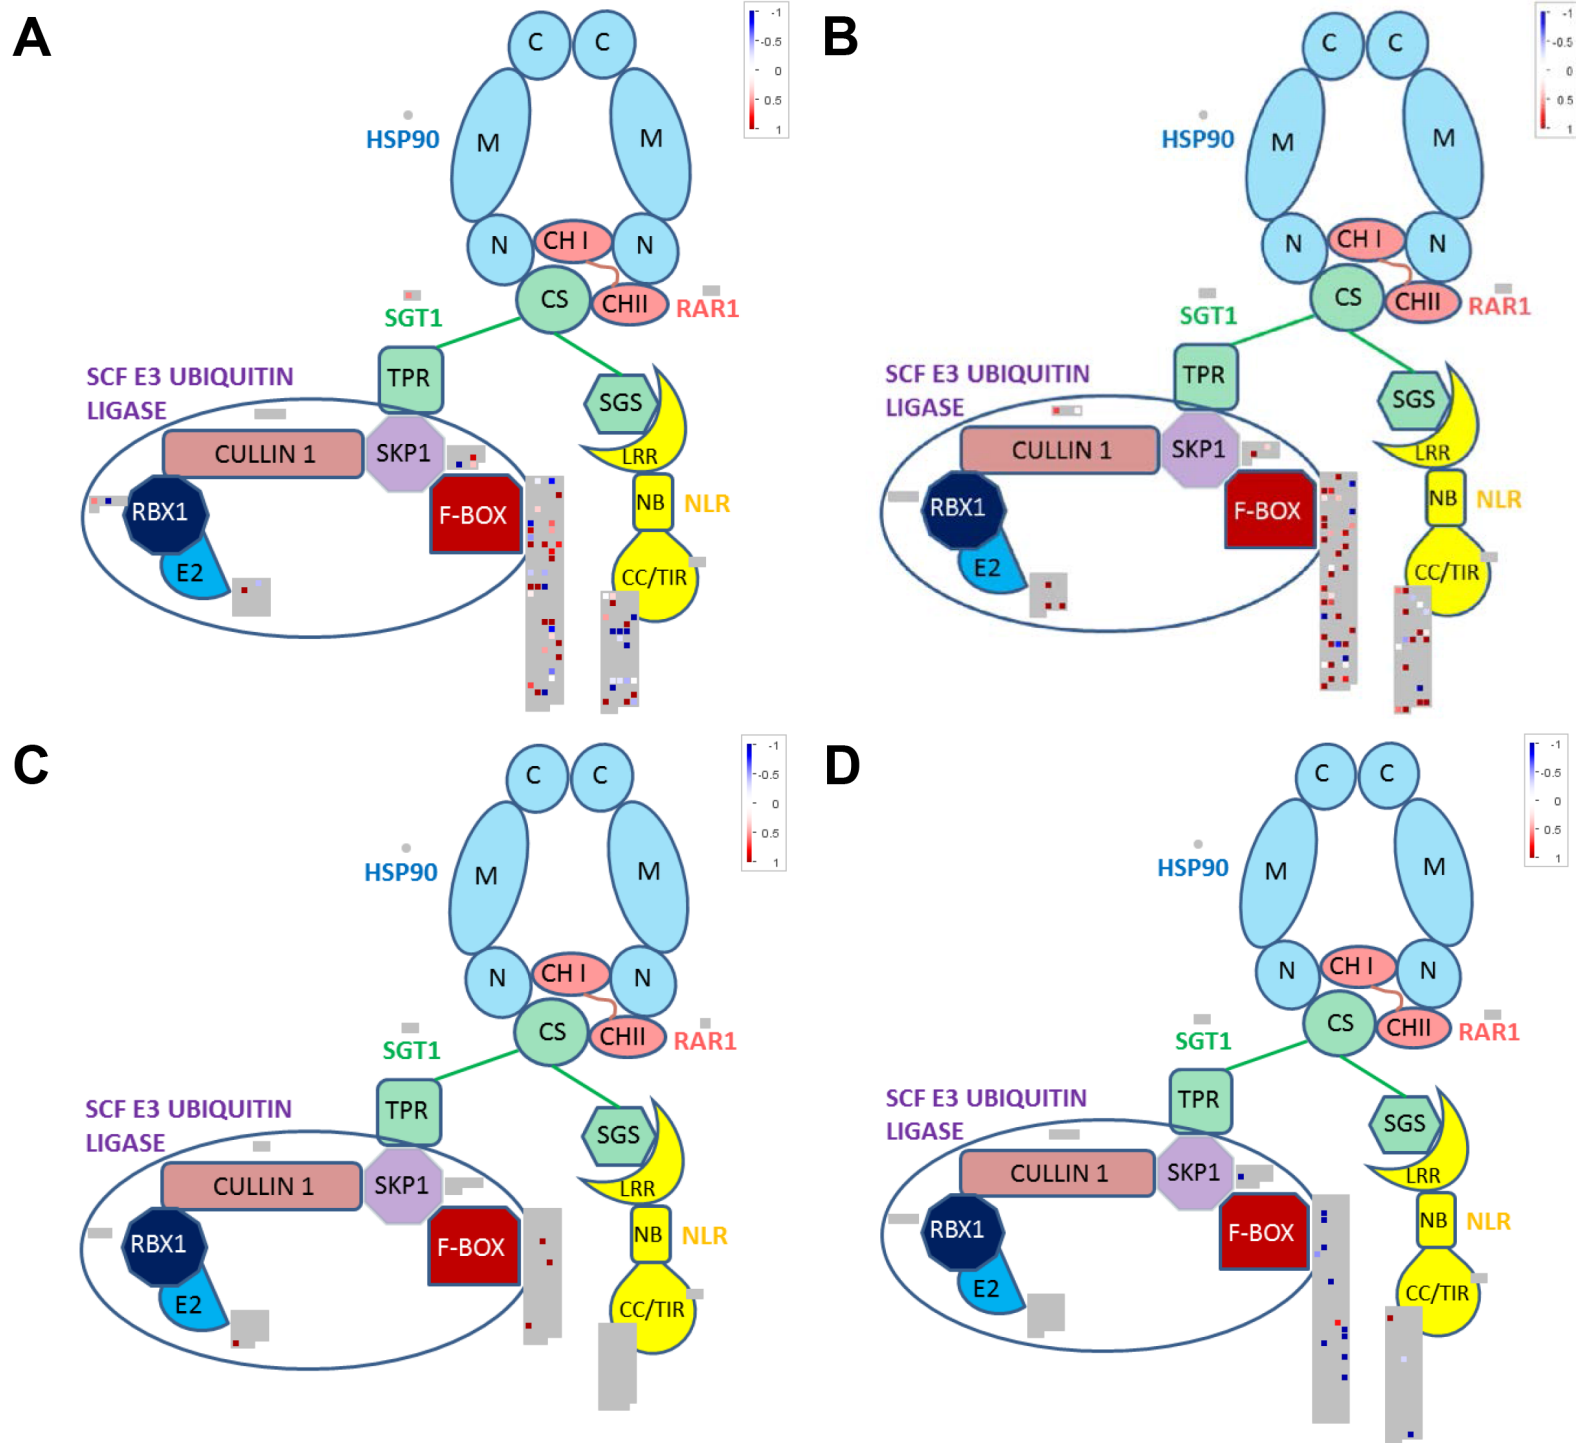

Source: http://biorxiv.org/content/10.1101/552562v1.full.pdf
